# Supplementary material
Source: Research Square preprint supplement (doi:10.21203/rs.3.rs-9340369/v1)
Supplement: Supplementary file 1 [file 373268e83d53ef10d63a03ab.docx]

**Supplementary Information**

**Title:** Breakdown or Breakthrough? How Event Disruption Shapes Entrepreneurial Resilience

**Part A. Survey Instruments (Questionnaire Items)**

**Time 1 Questionnaire**

**A1. Gender:** □Male   □Female

**A2. Age:** _______ years old

**A3. Highest level of education:** □High school/Vocational school or below

□Associate degree  □Bachelor's degree   □Master's degree  □Doctoral degree

**A4.** Total number of **entrepreneurial attempts** (including the current one): _______ , of which _______ resulted in **successful ventures**.

**A5. Pre-entrepreneurial work experience:** _______ year(s)

**A6.** An "event" refers to an unconventional occurrence that happens suddenly and has a major impact on the firm's development, such as sudden policy changes, external supply chain disruptions, internal R&D setbacks, or severe cash flow crises, among others. Has your firm recently experienced such an event?

□Yes   □No

**A7. Event Disruption (ED)**

Instructions: Please indicate your level of agreement with each statement about event disruption . (Likert Scale 5)

ER1. The event requires me to change the way I do my work.

ER2. The event disrupts my ability to get my work done.

ER3. The event causes me to stop my work and think about how to respond.

ER4. The event alters my normal way of completing my job.

**A8. Which of the following disruptive events has your firm recently encountered? (Check all that apply):**

□ Internal conflict and departure of core team members

□ Surge in costs due to macroeconomic fluctuations

□ Business stagnation caused by sudden policy changes

□ Failure of new product development due to internal R&D setbacks

□ Sudden external supply chain disruptions

□ Severe cash flow crisis due to strategic errors

**A9. How long ago did your firm encounter its most recent disruptive event?**

□Less than 6 months ago □6–12 months ago □12–18 months ago □18–24 months ago □24–30 months ago □30–36 months ago □More than 36 months ago

**Time 2 Questionnaire**

**B1. Exploratory Learning (EXR)**

Instructions: Please indicate your level of agreement with each statement about exploratory learning . (Likert Scale 5)

EXR1. In information search, we focused on acquiring knowledge of project strategies that involved experimentation and high market risks.

EXR2. We preferred to collect information with no identifiable strategic market needs to ensure experimentation in the project.

EXR3. Our aim was to acquire knowledge to develop a project that led us into new areas of learning such as new markets and technological areas.

EXR4. We collected novel information and ideas that went beyond our current market and technological experiences.

EXR5. Our aim was to collect new information that forced us to learn new things in the product development project.

**B2. Exploitative Learning (EXL)**

Instructions: Please indicate your level of agreement with each statement about exploitative learning. (Likert Scale 5)

EXL1. Our aim was to search for information to refine common methods and ideas in solving problems in the project.

EXL2. Our aim was to search for ideas and information that we can implement well to ensure productivity rather than those ideas that could lead to implementation mistakes in the project and in the marketplace.

EXL3. We searched for the usual and generally proven methods and solutions to product development problems.

EXL4. We used information acquisition methods (e.g., survey of current customers and competitors) that helped us understand and update the firm's current project and market experiences.

EXL5. We emphasized the use of knowledge related to our existing project experience.

**Time 3 Questionnaire**

**C1. Entrepreneurial Resilience (ER)**

Instructions: Please indicate your level of agreement with each statement about entrepreneurial resilience. (Likert Scale 5)

ER1. I am able to adapt to change.

ER2. I can deal with whatever comes my way.

ER3. I try to see the humorous side of things.

ER4. Coping with stress can strengthen me.

ER5. I tend to bounce back after illness or hardship.

ER6. I can achieve goals despite obstacles.

ER7. I can stay focused under pressure.

ER8. I am not easily discouraged by failure.

ER9. I think of myself as a strong person.

ER10. I can handle unpleasant feelings.

ER11. I do not give up even when things seem hopeless.

**Survey Completion**

**Thank you for your participation!**

**Part B. Data Collection Protocols**

We employed a three-wave longitudinal survey design for data collection, with a two-week time lag between adjacent measurement points. The survey was administered through a combination of on-site paper surveys (facilitated by the Jiangsu Enterprise Informatization Association during training sessions) and targeted online surveys (distributed via WeChat or email to previously established contacts).

- **Target Population:** Entrepreneurs operating in business incubation parks across various cities and provinces in China (including Beijing, Shanghai, Jiangsu, Guangzhou, and Anhui).
- **Sampling Method:** A combination of purposive and convenience sampling via on-site distribution and online professional networks.
- **Survey Waves:**
  - **Wave 1 (Time 1):** Measured entrepreneurs' demographic characteristics, event disruption, event duration, and event spatial proximity. (N = 438 valid responses out of 500 distributed; 87.60% effective response rate).
  - **Wave 2 (Time 2):** Measured exploratory learning and exploitative learning (2 weeks after Time 1). (N = 366 valid responses; 83.56% effective response rate).
  - **Wave 3 (Time 3):** Measured entrepreneurial resilience (2 weeks after Time 2). (N = 313; 85.52% effective response rate).
- **Final Sample Selection:** Among the 313 matched surveys, we screened out 88 responses that indicated no experience with significant disruptive events. Ultimately, 225 valid paired samples meeting all rigorous study conditions were retained for the main analyses.
- **Informed Consent:** Before commencing the studies, all participants were informed about the research and provided their consent.
- **Translation:** All scales were originally in English and were translated into Chinese using a standard translation-back-translation procedure to ensure measurement equivalence.

**Part C. Variable Details and Coding Schemes**

| **Variable Label** | **Description** | **Coding Scheme / Transformation** |
| --- | --- | --- |
| **ID** | Participant Unique Identifier | Anonymized numeric ID |
| **Gender** | Participant's Gender | 0 = Female, 1 = Male |
| **Age** | Participant's Age | 0 = 35 years and below, 1 = 36–45 years, 2 = 46 years and above |
| **Edu** | Education Level | 0 = Below Bachelor's, 1 = Bachelor's, 2 = Graduate degree or above |
| **Entrepreneurial attempts** | Number of entrepreneurial attempts | 0 = 1 venture, 1 = 2–3 ventures, 2 = More than 3 ventures |
| **Successful ventures** | Number of successful ventures | 0 = 0 successes, 1 = 1 success, 2 = 2 or more successes |
| **Pre-entrepreneurship work experience** | Years of prior employment | 0 = 5 years or less, 1 = 6–10 years, 2 = More than 10 years |
| **Event spatial proximity** | Event spatial proximity  (moderator) | Based on the distinction between internal and external environmental factors highlighted by Yamakawa et al. (2013) and Leoni (2025), we operationalized and coded the disruptive events encountered by the firms.   - -1 = External environmental factors (e.g., surge in costs due to macroeconomic fluctuations, business stagnation caused by sudden policy changes, and sudden external supply chain disruptions) - 1 = Internal environmental factors (e.g., internal conflict and departure of core team members, failure of new product development due to internal R&D setbacks, and severe cash flow crisis due to strategic errors)   As this measure was designed as a multiple-response question, we aggregated the scores of all options selected by each participant.   - 0 = Aggregated score < 0 (representing distant spatial proximity) - 1 = Aggregated score ≥ 0 (representing close spatial proximity) |
| **Event duration** | Event duration  (moderator) | 0 = 1 year or less, 1 = More than 1 year |
| **ED_aveg** | Event disruption (Independent) | **Mean** of ED_1 to ED_4 |
| **EXR_aveg** | Exploratory learning  (Mediator) | **Mean** of EXR_1 to EXR_5 |
| **EXL_aveg** | Exploitative learning  (Mediator) | **Mean** of EXL_1 to EXL_5 |
| **ER_aveg** | Entrepreneurial resilience (Dependent) | **Mean** of ER_1 to ER_11 |
