# Supplementary material
Source: Research Square preprint supplement (doi:10.21203/rs.3.rs-9340369/v1)
Supplement: Supplementary file 2 [file d9c214b063953715814a65d1.xlsx]

## Sheet: Raw data (N = 313)
ID	Gender	Age	Edu	Entrepreneurial attempts	Successful ventures	Pre-entrepreneurial work experience	Event Exposure	ED_1	ED_2	ED_3	ED_4	Event spatial proximity_1	Event spatial proximity_2	Event spatial proximity_3	Event spatial proximity_4	Event spatial proximity_5	Event spatial proximity_6	Event duration	EXR_1	EXR_2	EXR_3	EXR_4	EXR_5	EXL_1	EXL_2	EXL_3	EXL_4	EXL_5	ER_1	ER_2	ER_3	ER_4	ER_5	ER_6	ER_7	ER_8	ER_9	ER_10	ER_11
6364492	1	28	3	4	1	3	1	3	3	3	3	1	1	0	1	0	0	4	3	4	5	4	4	5	4	5	4	5	4	4	3	3	4	3	4	4	4	5	5
6364506	2	42	3	1	1	16	1	4	4	4	5	0	1	0	0	0	0	1	4	5	4	5	4	4	5	5	4	5	4	5	5	4	4	4	5	4	5	5	4
6363672	2	28	3	2	1	4	2	N/A	N/A	N/A	N/A	N/A	N/A	N/A	N/A	N/A	N/A	N/A	3	4	4	4	4	4	4	4	4	3	4	4	4	4	4	4	4	4	3	3	4
6364060	1	38	3	1	1	10	1	4	4	5	4	0	0	0	1	0	0	4	4	5	5	4	4	5	5	4	5	4	4	5	5	4	4	4	5	5	5	4	4
6363642	1	30	3	1	1	6	1	4	4	3	4	0	1	0	0	0	0	1	3	4	4	3	4	4	4	4	3	5	4	3	4	4	4	3	4	5	2	3	4
6364031	1	39	1	1	0	18	1	4	3	4	4	0	1	0	1	1	1	1	3	3	3	4	4	4	4	4	3	4	3	3	4	3	3	3	3	3	2	3	4
6363590	1	29	2	1	0	0	1	2	3	2	2	1	1	0	0	0	1	1	3	3	4	4	3	4	4	3	3	3	5	4	3	3	3	3	5	4	5	4	3
6363563	1	27	3	2	0	3	1	4	3	4	3	0	0	0	1	0	0	1	4	4	4	3	4	3	4	3	4	3	4	4	3	3	4	4	3	4	2	3	4
6363873	2	32	3	2	1	5	1	5	4	4	5	0	1	0	0	1	1	4	4	4	5	5	5	4	4	5	4	4	4	4	5	4	4	4	4	5	4	5	5
6363257	1	36	2	1	1	5	2	N/A	N/A	N/A	N/A	N/A	N/A	N/A	N/A	N/A	N/A	N/A	3	4	3	4	4	4	5	3	5	5	4	5	5	3	3	3	4	5	4	3	4
6363198	2	34	2	1	1	10	1	2	5	5	4	0	1	0	0	1	0	1	4	4	5	5	5	4	5	4	4	3	4	3	4	3	5	4	3	5	3	5	4
6362988	1	33	4	2	1	2	1	4	5	4	5	1	0	0	0	0	1	3	5	4	5	5	4	5	4	4	5	2	4	4	5	4	5	4	5	5	4	5	5
6362684	1	55	3	4	2	18	1	3	4	4	3	1	0	1	1	0	0	3	4	4	5	4	4	4	4	4	3	4	4	3	4	4	4	3	4	3	4	4	3
6363398	2	32	2	1	1	7	1	2	4	3	4	1	1	0	0	0	0	2	3	4	4	2	4	3	4	4	4	3	3	3	3	2	3	3	3	2	1	3	3
6362601	1	31	4	5	2	5	2	N/A	N/A	N/A	N/A	N/A	N/A	N/A	N/A	N/A	N/A	N/A	4	3	5	4	4	5	3	5	4	3	3	4	3	5	3	4	3	4	4	3	5
6363391	1	27	3	1	1	1	1	5	3	4	5	0	1	0	0	0	0	1	3	5	5	5	5	5	5	5	5	5	5	4	5	5	5	5	5	5	5	5	5
6361993	2	40	3	4	2	8	1	3	5	4	4	0	1	0	1	0	1	2	4	5	4	4	5	4	5	4	5	5	3	4	5	3	4	3	4	5	3	3	3
6362229	1	40	3	5	2	15	1	2	4	2	1	0	1	0	0	0	0	3	4	5	4	4	5	5	2	3	5	2	4	4	5	4	4	5	3	4	5	4	3
6362230	1	36	3	2	0	15	2	N/A	N/A	N/A	N/A	N/A	N/A	N/A	N/A	N/A	N/A	N/A	4	4	5	3	4	3	4	2	2	4	3	4	4	4	4	4	4	5	3	3	2
6362231	2	30	3	2	1	6	2	N/A	N/A	N/A	N/A	N/A	N/A	N/A	N/A	N/A	N/A	N/A	4	3	4	4	4	3	3	4	4	4	4	3	4	4	4	4	5	4	4	4	3
6362217	1	51	1	3	1	15	1	4	5	5	5	1	0	0	1	0	0	2	3	3	3	2	4	4	4	4	4	4	4	3	4	4	3	4	3	4	4	3	3
6362190	1	35	3	2	1	6	1	3	4	5	4	0	0	0	0	1	1	2	3	4	4	5	4	3	4	4	5	4	4	3	5	4	4	3	4	5	4	3	4
6362151	2	33	3	1	1	2	2	N/A	N/A	N/A	N/A	N/A	N/A	N/A	N/A	N/A	N/A	N/A	3	3	4	3	3	4	3	4	3	3	4	3	4	3	3	4	3	4	3	4	4
6362140	1	34	2	1	1	5	2	N/A	N/A	N/A	N/A	N/A	N/A	N/A	N/A	N/A	N/A	N/A	3	3	4	3	4	4	4	4	4	4	4	4	4	4	4	4	3	4	5	4	2
6361625	1	28	4	2	1	3	1	4	5	4	5	0	0	1	0	1	0	3	4	5	5	4	3	4	5	4	5	5	4	3	5	4	5	4	5	4	3	4	5
6361599	1	35	3	1	1	10	1	4	4	5	4	0	0	0	1	0	0	1	4	5	5	4	4	4	5	4	4	5	4	4	5	4	4	4	5	4	4	5	4
6361491	1	34	3	1	1	4	1	3	5	4	4	0	0	0	0	0	1	3	4	5	4	4	4	3	3	4	4	3	4	5	4	4	5	4	4	5	3	3	4
6361498	1	40	3	3	2	12	1	4	4	4	5	0	0	0	0	0	1	3	3	4	5	4	4	4	5	5	4	5	4	4	5	5	4	4	4	5	5	4	5
6361484	1	23	3	2	1	1	1	4	4	3	3	0	0	0	1	0	0	2	4	5	5	5	4	4	4	4	5	4	4	5	5	5	5	4	4	5	4	4	4
6360210	2	47	1	2	1	8	1	5	5	5	5	0	1	0	0	1	1	1	4	4	5	4	4	5	4	4	4	4	5	4	5	5	5	5	5	4	5	5	4
6360517	1	30	3	1	1	7	2	N/A	N/A	N/A	N/A	N/A	N/A	N/A	N/A	N/A	N/A	N/A	4	4	4	3	4	4	4	5	4	4	4	4	3	4	4	5	4	5	3	4	4
6360519	1	28	3	2	1	5	1	4	4	3	4	1	1	0	0	0	1	4	3	4	4	3	4	4	4	4	5	5	5	4	4	4	4	4	3	3	3	4	4
6359136	2	45	2	3	2	5	1	2	4	5	2	0	0	0	0	1	1	3	4	5	5	3	4	4	3	4	4	5	3	4	5	4	4	5	4	4	2	4	2
6359111	1	30	3	4	1	4	1	4	4	4	4	0	1	0	1	0	1	2	4	4	4	4	4	4	5	5	4	4	4	4	4	4	4	4	4	4	2	4	4
6358917	1	35	3	2	0	10	1	4	4	4	4	0	1	0	0	0	1	2	4	4	4	4	4	5	4	4	4	4	4	3	4	3	4	4	3	3	4	3	4
6358975	1	34	3	1	1	1	1	4	5	4	5	0	0	1	0	0	0	3	3	4	5	4	4	3	4	4	5	4	4	3	4	3	3	3	4	4	3	4	4
6358750	1	42	4	3	2	15	1	5	4	3	4	0	0	0	0	1	1	3	5	4	5	5	5	4	4	5	5	5	5	4	4	5	4	4	4	5	5	5	4
6358176	1	28	2	1	1	5	1	4	4	3	4	1	1	0	0	0	0	3	3	4	4	4	4	5	4	4	4	5	4	3	5	4	4	3	4	3	3	3	3
6358497	1	40	3	3	1	5	1	5	4	5	3	0	0	0	1	0	0	3	4	4	4	5	4	5	5	5	4	4	4	3	4	3	4	4	3	4	3	4	3
6358035	1	37	3	6	2	7	1	4	4	4	4	0	1	0	1	0	0	2	5	5	5	3	4	4	4	5	5	4	2	2	5	3	3	3	4	4	3	4	2
6357984	2	32	3	2	0	4	1	3	4	5	4	0	1	0	0	0	1	1	4	5	5	2	3	4	5	5	1	4	4	3	5	2	4	5	5	3	2	1	4
6357938	1	36	2	3	1	3	1	3	5	5	4	0	1	0	0	0	0	4	3	4	4	5	4	4	5	4	4	4	4	4	3	5	3	4	4	5	4	5	3
6357332	1	27	3	3	1	2	1	1	2	1	1	0	1	0	0	0	0	2	5	4	4	4	5	5	5	4	5	5	4	4	5	5	5	5	4	4	5	4	4
6357107	1	42	3	3	1	8	1	2	3	4	3	1	0	0	0	0	0	3	3	3	4	3	4	2	3	4	5	3	5	4	4	5	4	4	5	4	3	5	4
6356665	1	31	3	4	0	1	1	4	4	4	4	0	1	0	0	0	1	3	3	4	4	3	4	4	4	4	4	4	4	5	4	4	5	4	4	5	4	3	1
6357032	1	28	3	1	1	4	1	2	3	2	3	0	0	0	0	1	1	4	2	4	4	3	4	4	4	4	3	5	4	3	4	3	3	4	4	3	2	3	3
6356829	2	28	3	2	1	5	1	3	4	3	3	1	0	0	1	1	0	2	3	4	4	3	4	3	4	4	3	4	3	4	4	4	5	4	3	3	2	4	3
6356058	1	31	3	2	2	2	1	3	4	4	4	1	0	0	0	0	0	2	3	3	4	3	3	4	4	3	3	4	4	4	3	3	3	4	4	3	4	4	3
6355828	1	40	3	3	1	8	1	3	4	3	3	0	1	0	0	0	0	3	4	3	4	3	4	5	5	5	4	4	4	4	4	4	5	4	5	5	3	4	4
6356404	1	29	3	3	1	2	2	N/A	N/A	N/A	N/A	N/A	N/A	N/A	N/A	N/A	N/A	N/A	4	5	4	3	5	4	5	3	5	4	4	5	4	4	5	4	5	4	5	5	5
6355035	2	25	2	2	1	2	1	3	4	3	4	0	0	0	1	0	0	3	5	5	4	4	4	4	4	3	2	5	4	2	4	4	4	4	5	5	4	5	3
6354612	1	35	2	1	1	7	1	4	4	4	5	0	0	0	0	1	1	2	5	5	5	4	4	4	4	4	4	5	5	5	5	5	5	4	4	5	3	4	5
6354435	1	25	3	4	1	0	1	5	4	5	5	0	0	0	1	0	1	1	4	3	4	3	4	4	4	3	2	4	3	2	4	4	4	4	4	5	2	3	4
6354353	2	28	4	2	1	0	1	3	5	4	4	0	0	0	1	0	0	6	3	3	4	3	4	4	3	3	4	3	4	2	3	3	3	4	3	3	4	3	4
6353947	1	34	3	2	1	9	2	N/A	N/A	N/A	N/A	N/A	N/A	N/A	N/A	N/A	N/A	N/A	4	4	5	5	4	4	4	5	4	5	4	5	4	5	4	4	4	5	4	4	4
6354771	1	35	2	2	2	10	1	3	4	3	4	0	1	0	0	0	0	4	2	2	2	2	3	4	4	4	4	4	3	3	4	4	3	3	4	4	3	3	3
6353639	2	35	3	3	2	8	1	3	5	5	2	1	1	0	0	0	0	1	5	5	5	5	5	5	5	5	5	4	5	5	5	5	5	5	5	5	4	5	3
6352705	1	30	3	1	1	1	1	3	4	3	3	0	1	0	0	0	0	3	3	4	4	2	4	4	4	4	4	4	4	3	4	4	4	4	4	4	3	4	4
6352699	1	29	4	2	2	3	1	3	5	4	3	0	0	0	0	1	1	1	4	5	5	4	5	4	5	3	3	5	5	5	4	5	5	4	5	4	4	3	5
6352431	1	28	4	2	1	4	1	3	4	4	3	1	0	0	1	0	1	1	3	4	4	3	4	4	3	4	4	3	3	4	3	3	3	3	3	3	2	2	3
6352367	1	34	3	1	1	6	1	4	4	4	4	1	1	0	0	0	0	1	2	3	4	4	4	3	4	4	4	4	5	4	4	5	5	4	4	3	4	4	4
6352161	1	29	3	3	1	1	1	4	5	4	3	0	1	0	0	1	1	1	4	4	3	2	4	4	4	4	4	4	3	2	4	4	4	3	3	2	2	4	4
6352080	1	37	4	4	1	3	1	4	5	5	4	1	1	0	0	0	0	4	4	5	4	5	4	5	5	4	5	4	4	4	5	5	4	4	5	4	4	5	5
6352069	1	38	4	1	1	11	1	5	4	5	4	0	1	0	0	0	0	1	4	3	4	4	5	3	4	5	3	4	4	3	4	4	3	3	3	4	2	3	4
6351455	2	25	3	2	1	3	1	2	3	3	3	0	1	0	0	0	1	1	4	3	4	4	3	4	4	4	4	4	4	3	3	4	4	4	4	4	3	4	3
6351987	1	38	4	2	1	14	1	3	4	4	3	0	0	0	0	1	1	5	4	5	5	4	5	5	5	5	5	5	4	4	4	4	4	4	4	5	3	4	5
6351417	1	33	3	3	1	5	2	N/A	N/A	N/A	N/A	N/A	N/A	N/A	N/A	N/A	N/A	N/A	4	4	4	4	4	4	3	5	4	4	4	4	4	3	3	4	3	4	4	3	5
6351323	1	42	2	2	1	15	2	N/A	N/A	N/A	N/A	N/A	N/A	N/A	N/A	N/A	N/A	N/A	3	4	4	4	4	4	3	4	3	3	4	4	3	4	5	3	4	4	4	4	4
6351835	1	34	3	3	0	3	1	4	4	5	5	0	1	0	0	0	0	5	2	3	3	4	4	4	4	4	3	4	4	4	4	4	4	3	3	4	4	3	4
6350260	1	33	3	4	1	5	2	N/A	N/A	N/A	N/A	N/A	N/A	N/A	N/A	N/A	N/A	N/A	4	4	5	5	4	4	4	3	5	5	3	3	5	4	4	3	4	4	5	4	3
6349850	1	45	4	3	2	15	1	4	4	4	4	1	0	0	0	1	1	3	4	4	4	5	4	3	4	3	5	3	3	4	4	4	5	4	4	3	3	2	3
6349856	1	35	4	3	2	10	1	3	5	4	4	0	0	0	1	0	0	3	4	5	5	3	4	5	5	4	4	5	5	4	4	5	5	4	3	5	5	4	4
6349001	1	59	1	3	2	32	1	2	5	4	4	0	0	0	0	0	1	6	5	4	5	4	5	5	5	5	4	5	4	5	4	4	5	4	5	5	4	4	5
6349477	1	38	5	1	1	3	1	4	5	5	5	0	1	0	0	0	0	6	5	3	2	2	2	3	4	5	3	2	5	5	5	5	5	5	1	1	1	1	1
6349411	1	33	3	2	1	5	1	3	4	2	1	1	0	0	0	0	0	2	4	4	3	3	4	4	3	4	4	3	4	3	3	3	4	4	3	3	4	3	4
6349401	1	36	3	5	1	6	1	4	4	4	4	1	1	0	1	0	0	2	4	4	3	2	4	5	5	5	5	4	3	2	4	4	5	4	4	2	2	2	2
6349353	1	26	3	1	1	3	1	2	4	4	2	1	0	0	0	0	0	3	2	2	3	2	3	3	3	4	2	3	3	4	4	3	4	4	4	4	4	4	4
6349333	1	40	1	6	1	13	1	4	4	4	4	1	0	0	0	0	1	2	4	4	4	4	4	4	3	4	4	4	3	2	4	4	4	3	4	2	4	4	3
6348569	1	32	3	3	1	3	1	1	4	4	4	1	0	0	1	0	0	1	3	3	5	5	4	4	5	4	4	4	5	3	4	5	4	4	5	4	4	4	5
6348329	2	47	2	2	1	20	1	5	5	5	5	1	0	0	0	0	0	2	4	4	5	4	4	5	4	5	4	4	4	4	5	4	4	4	4	5	4	5	5
6347634	1	35	4	2	1	6	2	N/A	N/A	N/A	N/A	N/A	N/A	N/A	N/A	N/A	N/A	N/A	4	5	4	4	5	4	4	5	4	5	4	5	4	4	5	4	5	4	5	4	5
6347563	2	32	3	8	3	5	1	4	4	3	3	0	1	0	1	0	0	2	4	4	4	3	4	3	4	5	4	3	4	4	3	3	4	3	3	2	2	4	4
6347291	1	36	2	1	1	8	1	2	3	4	5	0	1	0	0	0	0	6	3	4	5	5	5	5	5	5	5	5	5	4	4	4	3	4	4	3	3	5	3
6346943	1	34	3	1	0	11	1	2	1	1	2	0	1	0	0	0	0	1	2	4	4	2	3	4	4	4	4	5	4	3	1	4	4	5	5	4	2	4	3
6346784	1	44	3	3	1	5	1	2	4	3	4	0	1	0	0	1	0	3	4	2	4	3	4	4	5	4	5	3	4	5	3	4	5	5	4	3	5	4	4
6335372	1	37	3	2	1	7	2	N/A	N/A	N/A	N/A	N/A	N/A	N/A	N/A	N/A	N/A	N/A	3	4	4	3	3	3	4	4	4	4	4	4	4	3	4	3	4	5	3	4	4
6346365	2	41	3	2	1	10	1	4	4	3	3	0	0	0	0	1	1	2	3	4	4	3	4	4	4	4	3	4	4	4	4	4	4	4	4	4	3	4	4
6346330	1	26	3	2	1	3	1	2	3	4	4	0	0	0	1	0	1	2	4	4	4	3	3	3	2	2	3	4	4	3	4	3	2	3	4	4	2	4	3
6346285	1	35	3	2	0	10	1	2	4	3	3	0	0	0	0	0	1	5	5	4	4	4	4	5	5	5	4	3	5	5	5	5	5	3	5	5	5	5	5
6346227	1	43	3	1	1	10	1	2	3	4	4	0	0	0	1	0	0	3	4	3	4	3	3	4	4	5	4	4	4	2	3	3	4	4	3	3	4	3	3
6345921	2	28	2	2	1	5	1	1	2	3	2	0	1	0	1	0	0	1	2	4	4	4	4	2	3	3	4	4	3	3	3	3	3	4	4	4	4	4	4
6345535	2	30	2	2	2	2	2	N/A	N/A	N/A	N/A	N/A	N/A	N/A	N/A	N/A	N/A	N/A	4	4	4	3	4	5	5	4	5	5	4	3	5	4	4	4	4	3	3	3	4
6345149	1	26	3	1	0	5	1	1	4	4	1	0	1	0	0	0	0	3	2	2	3	2	3	3	2	2	3	3	3	2	4	4	4	3	2	3	2	3	3
6345506	1	25	2	1	0	3	1	4	4	4	4	0	0	0	0	1	1	3	3	4	4	4	4	4	3	3	4	4	2	3	3	2	3	3	4	4	3	4	4
6345400	1	37	3	2	1	10	1	5	4	4	4	0	1	0	0	0	1	4	1	3	4	3	3	3	5	4	4	4	5	4	5	5	5	5	5	5	4	4	4
6344533	2	25	2	3	0	4	2	N/A	N/A	N/A	N/A	N/A	N/A	N/A	N/A	N/A	N/A	N/A	4	4	4	3	4	4	4	3	5	4	3	3	4	4	4	3	4	3	3	3	3
6344065	1	40	2	2	1	15	1	3	4	4	4	0	1	0	0	0	0	6	5	4	5	5	5	5	5	4	4	4	5	2	4	4	4	4	4	4	3	4	5
6343883	1	36	3	3	1	5	1	4	5	4	4	0	1	0	0	0	0	3	3	5	4	2	4	4	3	5	4	3	4	4	3	3	4	4	3	3	2	3	4
6343937	2	25	3	2	1	2	1	5	4	4	5	0	1	0	0	0	1	1	4	5	5	5	5	5	5	5	4	5	4	5	5	5	5	5	5	5	4	5	5
6345020	1	38	3	3	1	7	1	2	2	2	4	1	1	0	1	0	0	2	5	4	4	4	5	4	5	4	4	3	3	4	4	4	5	4	4	5	5	4	3
6343797	2	36	3	1	1	5	2	N/A	N/A	N/A	N/A	N/A	N/A	N/A	N/A	N/A	N/A	N/A	4	4	4	4	4	4	5	4	4	5	4	3	4	4	4	4	4	4	4	4	4
6343680	2	46	2	4	2	2	1	5	4	3	4	0	0	0	1	0	0	2	3	4	5	3	5	4	4	5	5	4	4	4	5	4	4	3	4	4	3	4	5
6343672	1	52	3	2	1	10	1	3	3	4	4	1	0	0	0	0	0	3	4	4	5	3	4	4	5	5	5	5	3	4	4	4	4	4	4	2	5	5	5
6343603	1	39	3	7	2	5	1	4	3	3	4	1	1	0	0	0	0	4	4	5	5	5	4	4	3	4	4	4	4	3	4	4	4	5	4	5	4	4	5
6343536	1	33	3	2	1	5	1	3	4	4	3	0	0	0	1	0	0	3	5	5	4	5	4	5	5	4	4	5	5	4	4	5	5	4	5	4	4	5	5
6343517	1	35	4	2	1	7	1	4	4	4	5	0	1	0	0	0	0	1	4	4	4	4	3	3	4	4	4	4	4	4	4	4	4	4	4	4	3	4	4
6342595	1	43	2	4	2	5	1	4	2	2	3	1	0	0	1	0	1	3	4	5	5	5	4	5	5	5	5	5	5	4	5	5	4	5	5	4	5	5	5
6341349	1	33	4	4	1	2	2	N/A	N/A	N/A	N/A	N/A	N/A	N/A	N/A	N/A	N/A	N/A	4	4	5	4	4	5	4	5	4	5	4	4	4	5	5	4	4	5	5	4	5
6341305	2	31	3	3	1	5	1	4	4	4	4	0	0	0	0	0	1	5	4	3	4	3	3	4	4	4	4	4	4	3	4	4	4	4	4	4	4	4	5
6340997	2	38	1	5	1	10	1	3	4	3	2	1	0	0	0	0	0	1	4	5	5	3	2	4	4	4	5	4	4	4	5	4	4	4	5	4	4	4	5
6340952	1	27	3	1	0	2	1	5	4	4	4	0	1	1	0	1	1	4	4	4	4	3	3	4	4	3	4	3	3	2	4	3	3	3	4	2	3	3	2
6340904	2	22	2	1	0	1	2	N/A	N/A	N/A	N/A	N/A	N/A	N/A	N/A	N/A	N/A	N/A	3	4	4	4	4	4	3	3	4	4	3	2	2	2	4	3	4	4	3	4	2
6340783	1	20	3	2	0	0	2	N/A	N/A	N/A	N/A	N/A	N/A	N/A	N/A	N/A	N/A	N/A	4	4	5	3	4	4	4	4	4	3	3	3	4	2	3	3	4	4	1	4	4
6339272	1	26	3	1	1	5	2	N/A	N/A	N/A	N/A	N/A	N/A	N/A	N/A	N/A	N/A	N/A	4	4	4	4	4	4	4	4	4	5	4	4	4	4	4	4	4	4	3	4	4
6339097	1	24	2	1	0	2	1	4	5	5	4	0	0	0	0	0	1	2	4	3	3	4	2	4	3	3	3	4	4	4	4	5	5	5	3	4	5	5	4
6338374	2	35	5	2	2	5	1	3	4	5	4	0	0	0	0	0	1	5	5	4	5	5	3	5	4	5	4	5	4	5	4	5	5	4	3	4	3	5	5
6338303	2	33	2	2	1	8	1	4	4	3	5	1	1	0	0	0	0	2	4	3	3	2	4	4	4	3	3	3	4	4	3	5	4	4	4	4	3	3	4
6337539	2	48	2	1	1	20	2	N/A	N/A	N/A	N/A	N/A	N/A	N/A	N/A	N/A	N/A	N/A	3	4	4	4	3	5	4	5	4	4	4	3	4	4	5	4	3	4	3	4	4
6336765	1	28	3	2	1	3	2	N/A	N/A	N/A	N/A	N/A	N/A	N/A	N/A	N/A	N/A	N/A	4	3	4	5	4	5	4	3	4	3	4	2	3	2	3	3	2	4	4	5	4
6336464	2	24	2	1	N/A	2	2	N/A	N/A	N/A	N/A	N/A	N/A	N/A	N/A	N/A	N/A	N/A	3	1	5	5	5	5	5	3	5	5	5	5	5	4	4	5	2	2	5	2	3
6336453	2	35	3	2	1	7	1	3	4	4	4	1	1	0	0	0	1	3	3	4	4	4	4	4	4	4	4	4	3	2	3	3	3	3	3	3	2	4	4
6336407	1	58	2	2	1	35	2	N/A	N/A	N/A	N/A	N/A	N/A	N/A	N/A	N/A	N/A	N/A	4	3	5	5	2	3	2	5	3	4	4	5	4	5	5	4	4	5	5	3	2
6336062	1	30	3	3	2	7	2	N/A	N/A	N/A	N/A	N/A	N/A	N/A	N/A	N/A	N/A	N/A	4	5	4	3	4	4	4	5	4	5	4	4	3	4	5	4	5	4	3	3	4
6336063	2	54	3	6	2	13	2	N/A	N/A	N/A	N/A	N/A	N/A	N/A	N/A	N/A	N/A	N/A	5	2	4	4	4	2	1	5	5	5	4	3	5	2	5	3	2	5	5	4	5
6334749	1	32	3	2	1	5	2	N/A	N/A	N/A	N/A	N/A	N/A	N/A	N/A	N/A	N/A	N/A	4	4	4	4	4	4	3	3	4	4	4	3	4	4	3	4	4	4	4	4	4
6335332	1	23	3	0	0	0	2	N/A	N/A	N/A	N/A	N/A	N/A	N/A	N/A	N/A	N/A	N/A	5	5	5	5	5	3	4	3	5	3	5	4	5	4	4	5	4	3	5	4	5
6332645	1	35	3	1	1	3	1	4	2	3	3	0	0	0	1	1	0	1	4	5	5	5	5	4	4	4	5	5	4	4	5	3	3	4	4	4	3	3	5
6331877	2	36	3	2	2	6	1	3	5	4	4	0	1	0	0	0	0	3	4	4	5	4	5	5	5	4	3	3	4	5	3	4	5	4	5	5	4	5	4
6331762	2	33	3	2	1	5	1	3	4	3	4	0	1	0	0	0	0	3	4	4	5	4	5	4	5	5	5	3	4	5	5	4	4	4	5	5	4	5	4
6331288	1	45	3	3	1	16	1	4	4	4	4	0	1	0	0	0	1	2	4	4	4	3	4	4	4	4	4	4	4	3	4	4	4	4	4	4	3	4	3
6331002	1	43	4	1	1	18	1	4	4	4	4	1	1	0	0	0	1	3	4	4	4	4	4	4	4	5	5	3	4	4	4	4	4	4	4	4	3	3	4
6330427	2	33	4	1	1	3	1	5	2	3	4	1	0	0	0	1	0	2	4	5	4	4	4	4	5	4	4	3	5	4	4	5	4	5	5	4	5	4	4
6329883	2	49	2	2	1	23	1	3	3	3	4	0	0	1	0	0	0	5	2	3	2	2	3	3	4	3	3	3	3	2	3	4	4	2	3	2	2	2	2
6328237	2	32	3	3	2	3	1	5	4	5	3	1	0	0	1	1	0	3	4	4	5	4	5	4	4	5	5	4	5	4	4	5	5	4	5	3	4	4	4
6325932	1	31	3	1	1	5	2	N/A	N/A	N/A	N/A	N/A	N/A	N/A	N/A	N/A	N/A	N/A	4	3	4	3	4	4	4	4	4	5	4	5	4	5	5	4	4	4	5	4	4
6325412	2	37	2	1	1	10	2	N/A	N/A	N/A	N/A	N/A	N/A	N/A	N/A	N/A	N/A	N/A	3	4	5	4	4	4	4	5	4	4	4	3	4	4	4	4	4	5	3	4	4
6323769	1	34	3	3	0	5	1	4	5	5	5	0	1	0	1	0	0	3	4	4	3	5	5	4	4	3	3	3	3	4	4	3	2	2	3	4	4	3	3
6324233	2	28	4	0	0	0	2	N/A	N/A	N/A	N/A	N/A	N/A	N/A	N/A	N/A	N/A	N/A	3	4	5	5	5	4	3	4	5	4	5	3	5	2	2	3	4	3	3	5	4
6284494	1	46	4	5	3	15	1	4	4	3	4	0	1	0	0	0	0	2	4	4	3	4	3	4	3	4	3	4	4	3	4	3	3	4	3	4	3	4	3
6322377	1	44	3	4	1	15	2	N/A	N/A	N/A	N/A	N/A	N/A	N/A	N/A	N/A	N/A	N/A	4	4	5	2	3	5	5	3	4	4	5	2	4	4	5	3	5	4	4	4	3
6321646	2	48	3	3	1	10	2	N/A	N/A	N/A	N/A	N/A	N/A	N/A	N/A	N/A	N/A	N/A	4	4	4	3	3	4	4	3	3	4	3	3	4	3	3	3	4	4	4	4	4
6321647	1	41	3	3	1	11	1	5	5	1	2	0	0	0	1	0	0	1	4	1	5	5	4	3	4	2	4	5	4	3	4	5	4	3	4	4	5	4	5
6320591	1	48	1	2	1	10	1	3	4	4	5	0	0	0	0	0	1	5	4	5	5	4	5	4	5	4	4	5	5	4	5	4	4	4	5	5	4	3	4
6320525	1	23	3	3	0	2	1	4	4	4	5	1	0	0	0	0	0	3	4	4	5	4	4	4	4	4	5	3	4	5	5	5	4	5	5	5	4	4	5
6320264	1	36	2	1	1	9	1	3	4	2	2	0	1	0	1	0	0	2	4	5	5	4	4	5	5	5	4	4	4	4	4	4	5	4	4	5	3	4	4
6318420	1	26	3	2	1	5	2	N/A	N/A	N/A	N/A	N/A	N/A	N/A	N/A	N/A	N/A	N/A	3	4	5	4	4	4	5	4	4	4	5	4	4	4	3	4	5	5	4	4	5
6315712	2	24	1	2	1	2	1	1	5	5	3	0	1	1	0	0	1	2	3	5	5	5	5	5	4	5	5	5	5	5	5	5	5	5	5	5	4	5	5
6316318	1	36	3	3	1	11	1	3	4	5	4	0	1	0	1	1	1	1	4	4	4	4	4	4	2	2	2	2	4	4	4	4	4	4	4	4	3	4	4
6316155	2	35	4	1	1	7	1	4	4	4	4	0	1	0	1	0	0	4	4	4	5	4	4	4	4	4	4	5	4	4	5	4	4	5	4	2	4	4	4
6315926	2	32	3	1	1	10	2	N/A	N/A	N/A	N/A	N/A	N/A	N/A	N/A	N/A	N/A	N/A	3	4	4	4	4	3	4	3	4	3	3	4	4	3	4	4	4	4	3	3	4
6314196	1	32	3	3	1	5	1	4	4	3	4	0	0	0	1	0	0	1	5	4	5	4	4	5	4	4	5	4	5	4	5	5	4	5	5	4	5	4	4
6314090	1	53	5	6	3	5	1	4	5	4	4	0	1	0	0	0	0	2	5	4	4	4	4	5	4	4	5	4	4	5	4	4	4	5	4	4	5	5	4
6314827	1	40	3	3	2	15	1	4	5	5	4	0	1	0	0	0	0	1	4	4	4	5	4	5	4	4	5	4	4	4	3	4	3	4	4	5	4	4	3
6314927	1	42	4	6	2	8	1	4	3	3	5	0	0	0	0	1	0	2	3	5	4	4	4	3	4	4	4	4	3	3	3	4	2	3	3	4	1	1	5
6312332	1	33	3	2	2	8	2	N/A	N/A	N/A	N/A	N/A	N/A	N/A	N/A	N/A	N/A	N/A	4	4	4	5	5	4	4	5	5	3	4	4	4	4	4	4	4	4	5	5	4
6312157	1	45	3	2	1	20	2	N/A	N/A	N/A	N/A	N/A	N/A	N/A	N/A	N/A	N/A	N/A	5	4	5	4	4	4	4	4	4	4	4	4	5	4	5	5	4	5	4	5	4
6311834	1	40	3	2	1	5	1	5	5	3	4	0	0	0	1	0	0	3	4	5	4	4	5	5	5	5	4	5	4	4	5	4	5	4	4	3	2	3	4
6311422	2	23	1	1	1	1	1	3	4	4	4	1	0	0	1	0	0	1	4	4	4	3	5	5	5	5	4	4	4	4	4	4	4	4	3	3	3	3	3
6311904	1	45	3	1	1	15	1	4	4	5	4	0	0	0	1	0	0	2	4	4	5	4	4	4	4	5	4	4	4	4	5	4	4	4	4	5	4	4	4
6311818	1	40	3	2	2	10	2	N/A	N/A	N/A	N/A	N/A	N/A	N/A	N/A	N/A	N/A	N/A	4	3	4	4	4	4	4	3	4	4	4	4	4	4	4	4	4	5	3	4	4
6310772	2	38	3	1	1	6	2	N/A	N/A	N/A	N/A	N/A	N/A	N/A	N/A	N/A	N/A	N/A	4	4	3	4	5	4	4	5	4	5	4	5	4	4	5	5	4	4	5	4	5
6309499	1	41	2	2	1	15	1	3	4	4	4	1	0	0	0	0	0	2	3	4	3	2	2	3	2	3	4	4	4	4	3	5	3	4	5	3	2	5	3
6309864	1	43	3	2	1	18	1	4	5	5	4	0	0	0	0	1	1	4	4	5	5	4	5	4	4	4	5	5	4	4	5	4	4	4	5	4	5	5	5
6309685	1	34	3	2	1	5	1	4	4	5	4	0	1	0	1	0	1	3	5	4	5	4	4	4	5	4	5	4	5	4	4	4	5	4	5	5	4	4	5
6310747	1	33	4	3	1	2	1	2	4	5	5	0	1	0	0	0	1	1	4	5	5	4	4	4	4	4	3	4	4	3	4	5	4	4	4	4	3	3	4
6309235	1	35	3	2	1	5	1	3	4	4	4	0	1	0	0	1	0	2	4	4	5	4	5	4	4	5	4	4	4	4	5	4	4	4	4	5	4	4	5
6306594	1	28	3	3	0	2	2	N/A	N/A	N/A	N/A	N/A	N/A	N/A	N/A	N/A	N/A	N/A	4	4	5	4	4	4	5	4	4	3	4	4	5	5	4	4	3	4	3	4	4
6305746	1	30	4	3	1	5	1	3	4	3	4	0	0	0	1	1	0	2	5	5	4	4	5	5	4	5	5	5	5	4	5	4	5	5	5	4	5	5	4
6305689	1	33	3	6	2	4	1	5	4	5	4	1	0	0	1	0	0	3	5	5	4	4	5	5	4	5	5	3	5	4	4	4	5	4	4	5	5	5	5
6302276	2	30	3	2	1	2	1	3	3	3	4	1	1	0	0	0	1	2	4	4	4	4	5	4	4	4	4	4	4	4	4	4	4	5	5	5	3	4	4
6302254	2	42	3	2	1	14	1	5	4	4	5	0	1	0	0	0	0	2	4	5	5	4	4	5	5	4	4	5	4	4	5	5	4	4	5	5	4	5	5
6300465	2	27	3	2	0	5	2	N/A	N/A	N/A	N/A	N/A	N/A	N/A	N/A	N/A	N/A	N/A	4	3	3	3	4	4	4	5	4	4	4	4	5	3	4	4	3	4	3	3	4
6299446	1	33	2	2	1	2	2	N/A	N/A	N/A	N/A	N/A	N/A	N/A	N/A	N/A	N/A	N/A	4	3	4	4	3	3	3	4	3	3	4	3	3	4	4	4	4	3	3	4	3
6299026	2	31	3	1	1	3	2	N/A	N/A	N/A	N/A	N/A	N/A	N/A	N/A	N/A	N/A	N/A	4	5	4	5	4	5	4	5	5	4	4	5	4	5	4	4	5	4	5	4	5
6298944	2	37	3	1	1	14	2	N/A	N/A	N/A	N/A	N/A	N/A	N/A	N/A	N/A	N/A	N/A	3	5	5	5	5	5	5	3	5	5	4	4	4	5	5	4	5	3	3	4	5
6298924	1	28	3	3	1	5	2	N/A	N/A	N/A	N/A	N/A	N/A	N/A	N/A	N/A	N/A	N/A	4	4	4	3	3	4	4	5	4	3	4	4	5	4	5	4	4	4	3	4	3
6298885	2	40	3	4	1	5	1	2	3	2	3	1	0	0	0	0	0	3	4	5	3	3	4	4	4	3	5	4	4	3	4	5	4	4	4	4	5	4	4
6298529	1	32	4	2	1	4	1	4	4	5	5	0	0	0	1	0	0	2	4	5	4	4	5	4	5	4	5	4	4	5	4	5	4	4	5	4	5	4	5
6297802	1	44	2	2	1	15	2	N/A	N/A	N/A	N/A	N/A	N/A	N/A	N/A	N/A	N/A	N/A	3	4	4	4	4	4	3	3	3	3	3	4	4	3	4	3	4	3	3	4	4
6297515	1	40	3	1	1	10	1	3	5	4	4	0	0	0	1	0	0	5	4	3	5	4	4	4	4	5	4	4	4	5	5	4	5	4	4	4	3	4	5
6297469	1	35	3	2	1	5	1	5	4	4	5	0	0	0	1	0	0	3	4	5	4	4	5	4	4	5	5	4	4	4	4	5	5	5	5	4	4	4	4
6295980	1	38	4	8	6	10	1	4	3	4	3	0	0	0	1	0	0	5	4	3	4	3	4	5	4	3	4	4	4	3	4	5	4	3	4	3	4	5	4
6295544	2	23	2	1	N/A	2	1	4	4	4	4	0	0	1	0	0	0	2	3	4	4	3	3	2	4	4	4	4	4	2	3	4	4	3	4	4	3	3	2
6295119	1	35	3	5	2	8	1	5	4	5	4	0	1	0	1	0	0	2	3	4	4	5	5	3	4	4	4	4	4	3	5	4	4	5	4	4	4	3	5
6294581	1	42	3	2	1	10	2	N/A	N/A	N/A	N/A	N/A	N/A	N/A	N/A	N/A	N/A	N/A	3	2	3	1	3	5	4	1	5	3	3	5	4	5	3	4	3	5	4	2	5
6294464	2	30	3	2	1	6	1	3	5	4	4	0	0	0	0	1	1	2	5	4	5	4	4	4	5	4	4	4	4	4	4	4	3	4	4	4	3	4	4
6294376	1	43	3	4	2	10	1	4	4	3	4	0	1	1	0	1	0	1	4	3	4	3	4	4	4	3	4	4	4	4	4	4	4	4	3	4	4	3	5
6294330	1	38	5	1	1	7	1	3	4	5	3	0	1	0	0	0	0	4	4	5	4	3	4	4	3	4	5	4	4	3	4	5	4	4	5	4	3	4	4
6293930	1	33	3	3	1	2	1	3	4	4	5	0	0	0	1	0	0	2	3	4	4	4	5	4	3	4	4	4	4	5	4	4	4	5	3	4	3	4	4
6293329	2	35	3	3	1	10	1	3	4	4	4	0	1	0	1	0	0	1	4	4	5	4	4	4	4	5	4	4	4	5	4	4	4	4	4	4	5	4	4
6292853	2	25	3	3	1	2	1	3	3	4	4	0	1	0	0	0	1	2	4	4	5	4	4	4	5	4	4	4	4	4	5	4	5	4	5	4	5	4	5
6292683	1	34	3	1	1	0	1	4	4	4	5	1	0	0	0	0	0	4	4	3	4	2	4	3	4	4	3	5	4	3	4	3	3	4	3	4	5	3	4
6292581	1	42	3	1	0	14	1	4	4	4	3	0	1	0	0	0	0	6	5	4	5	5	4	3	5	4	3	3	5	4	4	4	4	4	5	3	3	4	3
6292138	2	47	2	3	1	4	1	4	4	3	4	0	1	0	1	0	0	5	3	4	4	3	4	5	4	4	5	3	4	4	5	4	4	4	3	4	4	3	4
6292119	1	50	2	8	2	10	2	N/A	N/A	N/A	N/A	N/A	N/A	N/A	N/A	N/A	N/A	N/A	4	5	4	4	5	5	4	3	4	5	5	4	4	5	5	4	5	4	5	4	5
6292044	1	42	3	3	1	6	2	N/A	N/A	N/A	N/A	N/A	N/A	N/A	N/A	N/A	N/A	N/A	4	4	5	4	5	4	5	3	4	5	4	3	5	5	4	5	4	5	3	4	5
6292006	1	34	4	2	1	9	1	3	4	5	5	0	1	0	0	0	0	1	4	4	5	3	4	3	4	4	5	4	4	4	3	2	4	4	3	4	2	3	5
6291122	1	43	4	15	3	5	1	4	5	5	3	0	1	0	1	0	0	1	4	5	5	4	4	5	5	5	4	5	5	5	5	3	4	4	3	4	5	3	3
6287753	1	32	3	1	0	6	1	3	4	4	5	0	1	0	0	0	0	4	2	4	4	4	4	4	3	4	5	5	4	3	3	3	3	3	4	4	3	4	3
6288760	2	35	3	2	1	5	1	5	5	4	3	0	1	0	0	0	0	1	5	5	5	5	5	4	4	4	5	4	5	3	4	4	5	5	4	5	4	5	4
6288502	1	39	3	1	1	7	2	N/A	N/A	N/A	N/A	N/A	N/A	N/A	N/A	N/A	N/A	N/A	4	5	4	5	4	5	4	5	4	5	4	5	4	5	4	5	4	5	4	5	4
6288290	2	28	3	1	1	3	1	5	4	5	5	0	1	0	1	1	0	5	5	5	5	5	5	4	5	4	3	4	5	4	5	5	5	4	5	2	4	4	5
6288192	2	34	3	2	1	10	2	N/A	N/A	N/A	N/A	N/A	N/A	N/A	N/A	N/A	N/A	N/A	3	4	4	3	4	3	4	3	4	3	3	4	4	5	4	4	4	3	3	4	4
6288169	1	36	3	1	1	12	2	N/A	N/A	N/A	N/A	N/A	N/A	N/A	N/A	N/A	N/A	N/A	5	5	5	5	5	5	5	5	4	5	4	4	4	4	4	4	4	5	5	3	4
6288014	1	38	3	1	1	5	2	N/A	N/A	N/A	N/A	N/A	N/A	N/A	N/A	N/A	N/A	N/A	4	5	4	4	5	4	5	4	5	4	4	4	5	4	5	4	4	5	4	5	4
6287982	2	32	3	4	1	3	1	1	5	1	5	0	1	0	0	1	0	2	4	5	5	5	4	5	5	4	5	5	5	4	5	5	5	5	4	5	4	5	2
6287901	2	39	3	5	5	18	2	N/A	N/A	N/A	N/A	N/A	N/A	N/A	N/A	N/A	N/A	N/A	4	3	2	2	2	4	4	2	3	3	3	2	3	3	3	3	3	3	3	3	2
6286781	1	35	3	1	1	2	1	3	4	4	5	0	0	0	0	1	1	4	4	5	5	4	4	5	5	4	5	4	5	4	5	4	5	4	5	5	4	4	5
6285432	2	43	3	1	1	20	2	N/A	N/A	N/A	N/A	N/A	N/A	N/A	N/A	N/A	N/A	N/A	3	4	4	3	4	4	4	5	4	4	4	3	4	4	4	4	4	3	3	4	3
6287164	1	41	3	2	1	10	1	2	3	4	3	0	1	0	0	0	0	2	3	4	3	4	3	4	4	4	3	3	4	5	4	4	3	4	3	4	5	4	4
6287088	1	30	3	1	1	3	2	N/A	N/A	N/A	N/A	N/A	N/A	N/A	N/A	N/A	N/A	N/A	4	4	3	4	4	5	4	5	4	4	4	4	3	4	5	4	5	4	4	5	4
6286894	1	34	4	3	2	5	1	5	5	5	4	1	1	0	0	0	1	3	3	4	4	5	4	4	3	3	5	4	4	5	4	4	4	5	4	4	5	4	5
6286849	1	42	3	3	1	10	2	N/A	N/A	N/A	N/A	N/A	N/A	N/A	N/A	N/A	N/A	N/A	3	4	4	4	3	4	4	3	4	3	4	4	4	4	4	4	5	5	3	4	5
6285956	1	38	2	1	1	12	1	5	4	5	4	0	0	0	1	0	0	2	4	4	5	4	5	4	4	4	5	4	5	4	5	4	4	5	4	5	4	5	4
6285869	1	36	3	2	1	7	1	4	5	4	4	0	1	0	0	0	0	1	5	4	4	5	5	4	4	5	5	4	4	3	4	3	3	3	4	5	4	4	4
6285784	1	35	4	2	1	8	1	4	3	5	4	0	0	0	1	0	0	2	4	5	4	5	4	4	5	4	4	5	4	5	4	5	4	4	5	4	4	5	5
6285785	1	32	4	3	1	7	2	N/A	N/A	N/A	N/A	N/A	N/A	N/A	N/A	N/A	N/A	N/A	4	5	4	3	4	4	4	5	4	5	4	4	4	4	4	4	5	4	4	4	4
6285544	1	47	3	4	3	6	1	5	4	4	5	1	0	0	1	0	0	3	4	5	4	5	4	4	4	4	5	4	5	4	4	4	5	4	5	4	5	5	5
6285414	1	34	2	1	1	4	1	4	5	4	4	1	0	0	0	0	0	5	3	4	4	3	4	4	4	3	3	4	4	3	4	3	3	4	4	3	2	2	3
6285249	1	35	3	2	1	7	2	N/A	N/A	N/A	N/A	N/A	N/A	N/A	N/A	N/A	N/A	N/A	4	5	4	4	4	4	4	3	4	4	4	4	5	4	4	3	4	4	4	3	3
6285075	2	33	3	1	1	7	2	N/A	N/A	N/A	N/A	N/A	N/A	N/A	N/A	N/A	N/A	N/A	4	5	5	5	4	4	5	5	4	5	5	4	5	5	4	5	5	4	5	5	4
6284901	2	33	3	3	1	5	1	5	5	4	5	0	1	0	0	0	0	3	5	5	4	5	5	5	4	4	4	4	4	4	4	4	5	4	4	4	4	5	4
6284795	1	38	2	2	1	15	2	N/A	N/A	N/A	N/A	N/A	N/A	N/A	N/A	N/A	N/A	N/A	3	4	4	3	4	4	5	4	4	5	4	4	5	4	4	5	4	5	5	4	4
6284826	1	34	4	3	1	10	1	3	2	3	3	0	1	0	0	0	0	2	4	5	5	5	5	5	4	3	4	3	4	4	5	5	5	4	4	5	4	5	5
6284778	1	27	3	3	2	3	1	3	4	4	5	0	1	0	0	0	0	2	5	4	5	5	5	4	4	5	5	4	4	5	5	5	4	4	5	5	4	4	5
6284752	2	23	3	2	1	1	1	5	5	4	5	0	0	0	1	0	0	2	5	4	4	5	5	5	4	4	5	4	5	4	4	5	5	4	4	5	4	4	5
6284750	1	35	3	3	1	10	1	3	4	4	4	0	1	0	0	0	0	2	4	5	5	5	4	4	4	4	4	5	4	4	5	4	4	4	4	5	4	4	4
6284741	2	47	3	2	1	12	2	N/A	N/A	N/A	N/A	N/A	N/A	N/A	N/A	N/A	N/A	N/A	4	5	5	4	4	4	5	4	5	5	3	4	4	4	4	4	4	3	3	3	4
6284662	1	29	4	2	1	2	1	5	4	5	4	1	1	0	0	0	0	2	4	4	5	4	5	4	5	5	5	4	4	4	4	5	5	5	4	5	4	4	4
6284607	1	36	3	3	1	6	1	2	4	3	3	0	1	0	1	1	0	5	4	5	5	4	5	4	5	5	4	5	4	4	5	5	4	4	5	5	4	4	5
6284614	1	33	3	3	1	10	2	N/A	N/A	N/A	N/A	N/A	N/A	N/A	N/A	N/A	N/A	N/A	4	5	5	4	4	5	4	5	4	4	4	4	5	4	5	4	4	5	4	4	4
6284581	1	32	3	1	1	5	2	N/A	N/A	N/A	N/A	N/A	N/A	N/A	N/A	N/A	N/A	N/A	4	4	5	5	4	4	5	4	4	4	4	5	4	4	5	5	4	4	3	4	5
6284539	1	43	5	1	1	12	1	4	5	4	4	1	0	0	1	0	1	1	4	5	5	5	5	4	4	5	4	4	4	4	5	4	4	4	4	5	5	4	3
6284567	1	38	3	1	1	10	1	4	4	5	4	0	1	0	0	0	0	1	3	5	5	4	4	5	4	5	5	4	4	5	5	4	5	5	4	4	5	4	4
6286283	1	30	3	3	1	3	1	2	5	4	5	0	0	0	0	1	1	3	4	5	5	4	5	4	5	4	4	5	4	5	4	4	5	4	5	4	5	4	4
6284447	1	33	3	1	1	4	1	4	4	4	4	0	1	0	0	0	0	2	4	4	3	3	4	5	4	4	4	4	4	3	4	4	4	4	5	4	3	4	4
6284449	1	34	3	2	1	7	2	N/A	N/A	N/A	N/A	N/A	N/A	N/A	N/A	N/A	N/A	N/A	4	5	4	5	5	4	4	5	4	5	4	5	3	5	5	4	5	4	5	4	5
6284436	1	38	3	3	2	10	2	N/A	N/A	N/A	N/A	N/A	N/A	N/A	N/A	N/A	N/A	N/A	4	5	5	4	4	4	5	4	4	5	4	4	5	4	5	4	5	5	4	5	5
6284416	2	40	4	1	0	16	1	5	4	3	3	0	1	0	1	0	0	2	4	5	5	4	4	3	4	4	5	3	4	5	3	3	4	4	3	5	3	4	5
6286031	2	58	2	3	1	15	2	N/A	N/A	N/A	N/A	N/A	N/A	N/A	N/A	N/A	N/A	N/A	4	5	5	4	5	4	5	4	4	5	4	3	5	4	4	4	5	4	5	4	5
6284362	2	35	2	1	1	8	1	5	5	5	4	0	0	0	0	1	1	2	5	4	4	5	4	4	3	5	5	4	4	5	4	4	5	4	5	3	4	4	5
6284100	1	39	3	3	2	11	2	N/A	N/A	N/A	N/A	N/A	N/A	N/A	N/A	N/A	N/A	N/A	4	5	4	4	5	4	5	4	5	4	4	5	4	5	4	4	5	4	4	5	4
6284122	1	38	3	2	1	11	1	2	4	5	3	0	0	0	1	0	0	2	4	5	5	4	4	3	4	3	4	3	4	4	5	5	4	4	4	5	3	4	5
6284118	2	32	3	2	1	5	1	2	4	3	4	0	0	0	0	0	1	3	4	4	5	4	4	4	5	4	5	4	4	2	4	3	4	4	3	4	3	4	2
6283952	2	35	4	1	1	7	1	2	4	3	3	0	1	0	0	0	0	1	5	5	4	4	5	4	4	5	4	5	5	4	4	5	5	4	5	5	4	4	5
6284067	1	45	3	4	1	15	2	N/A	N/A	N/A	N/A	N/A	N/A	N/A	N/A	N/A	N/A	N/A	3	4	4	2	4	4	3	4	4	4	4	4	3	4	4	4	4	3	4	3	4
6284066	1	38	4	1	1	7	2	N/A	N/A	N/A	N/A	N/A	N/A	N/A	N/A	N/A	N/A	N/A	4	5	4	4	4	5	4	4	5	4	4	5	4	4	5	4	4	5	4	4	5
6284039	1	36	4	1	1	7	2	N/A	N/A	N/A	N/A	N/A	N/A	N/A	N/A	N/A	N/A	N/A	4	5	4	4	5	4	4	4	4	5	4	5	4	4	4	5	5	4	4	5	4
6284024	1	38	3	1	1	14	1	4	4	5	5	0	0	0	1	0	0	2	4	4	5	4	5	3	3	3	4	3	4	4	5	5	4	4	5	4	4	4	5
6283969	1	34	3	1	1	8	1	2	3	4	5	0	1	0	0	0	0	2	4	3	4	4	5	5	4	4	5	4	4	5	4	4	5	4	5	4	5	4	5
6284010	1	34	3	3	1	6	1	4	5	4	5	0	1	0	0	0	0	5	4	5	4	4	5	4	4	5	4	5	4	5	4	4	5	4	4	5	4	4	5
6283988	1	38	4	2	2	7	1	2	4	4	4	0	0	0	1	0	0	1	4	5	5	4	4	5	5	5	5	5	4	4	5	4	4	5	4	4	4	5	4
6283953	1	35	2	1	0	8	1	5	2	1	1	0	0	0	0	1	1	6	2	1	2	1	2	5	4	5	5	5	4	5	4	4	4	4	5	5	4	4	5
6283944	1	35	3	1	1	9	2	N/A	N/A	N/A	N/A	N/A	N/A	N/A	N/A	N/A	N/A	N/A	5	4	5	3	5	5	5	4	5	5	4	4	3	5	5	4	5	4	3	4	5
6283923	1	48	3	3	2	18	1	3	4	3	3	0	0	1	1	0	0	3	4	5	5	4	3	4	4	3	3	4	4	4	3	3	2	3	4	4	3	4	3
6283896	1	29	3	3	1	3	2	N/A	N/A	N/A	N/A	N/A	N/A	N/A	N/A	N/A	N/A	N/A	3	4	5	4	5	5	4	5	4	5	5	3	4	3	4	4	5	5	3	4	4
6283879	1	52	2	3	2	27	2	N/A	N/A	N/A	N/A	N/A	N/A	N/A	N/A	N/A	N/A	N/A	4	4	4	3	4	4	5	4	4	4	4	3	4	5	5	4	4	4	5	3	4
6283872	1	31	3	1	1	2	1	3	4	3	3	0	0	0	0	1	1	3	4	5	5	5	5	4	5	5	4	4	5	3	4	3	3	4	4	5	4	4	5
6283875	2	34	3	1	1	10	1	4	5	5	4	1	0	0	1	0	0	3	4	4	5	4	4	4	5	4	4	5	4	4	5	4	4	4	5	4	4	4	4
6283860	1	33	2	2	1	4	1	5	4	5	5	1	1	0	0	0	0	3	5	4	5	4	5	4	4	4	5	5	5	4	4	4	5	4	4	5	3	4	4
6283863	1	31	4	2	1	2	2	N/A	N/A	N/A	N/A	N/A	N/A	N/A	N/A	N/A	N/A	N/A	3	5	5	4	5	5	4	5	4	4	4	4	5	4	4	5	5	4	3	4	3
6283857	1	36	1	3	1	10	1	5	5	5	5	0	1	1	0	0	0	2	4	5	5	5	4	5	5	5	5	3	4	5	5	5	5	5	5	5	4	5	5
6283851	2	33	4	3	1	1	1	3	4	5	3	0	1	0	0	0	0	3	5	4	5	5	4	5	5	4	5	4	5	4	5	4	5	5	4	5	4	5	5
6283850	1	40	3	1	1	13	1	4	4	4	5	0	1	0	0	0	1	1	5	4	4	5	5	4	5	4	4	5	4	4	4	4	5	4	5	5	4	5	5
6283810	2	32	3	2	1	3	2	N/A	N/A	N/A	N/A	N/A	N/A	N/A	N/A	N/A	N/A	N/A	5	4	4	5	4	4	5	5	4	5	4	4	5	4	4	4	3	4	3	4	4
6283824	1	35	4	1	0	6	2	N/A	N/A	N/A	N/A	N/A	N/A	N/A	N/A	N/A	N/A	N/A	5	4	5	4	5	4	5	4	5	4	4	2	4	5	4	5	4	5	3	5	4
6283814	1	42	3	3	2	10	2	N/A	N/A	N/A	N/A	N/A	N/A	N/A	N/A	N/A	N/A	N/A	4	4	5	5	4	5	5	4	4	5	4	5	5	4	5	4	4	5	5	5	4
6283816	1	39	3	3	2	12	1	4	4	4	4	1	1	0	0	1	0	4	4	4	5	4	4	4	4	4	4	3	4	4	4	5	4	4	4	4	4	4	4
6283815	1	31	3	2	1	4	2	N/A	N/A	N/A	N/A	N/A	N/A	N/A	N/A	N/A	N/A	N/A	5	4	4	5	4	4	4	5	5	5	5	4	4	4	5	5	4	4	5	5	4
6274916	1	32	3	3	2	2	1	4	5	4	4	0	0	0	1	0	0	1	5	4	5	4	4	5	4	4	4	4	5	4	4	4	4	5	4	5	4	4	5
6272964	2	32	4	1	1	8	2	N/A	N/A	N/A	N/A	N/A	N/A	N/A	N/A	N/A	N/A	N/A	4	3	5	4	4	4	4	4	4	4	3	4	4	3	3	4	4	3	2	3	3
6270936	2	32	4	1	1	5	1	3	2	2	1	0	0	0	1	0	0	2	4	5	4	4	5	4	3	4	4	5	4	5	4	4	3	4	5	4	4	5	4
6268803	1	53	4	1	0	20	1	2	3	2	3	0	0	0	0	0	1	3	4	5	4	4	4	4	4	5	4	5	5	4	4	5	5	4	4	5	4	4	5
6268056	1	28	3	1	1	3	2	N/A	N/A	N/A	N/A	N/A	N/A	N/A	N/A	N/A	N/A	N/A	5	5	4	4	4	4	5	3	4	4	4	4	5	5	5	4	4	5	5	4	5
6267945	2	33	3	1	1	4	2	N/A	N/A	N/A	N/A	N/A	N/A	N/A	N/A	N/A	N/A	N/A	3	4	4	5	5	5	4	4	5	4	4	4	5	4	4	4	5	5	5	5	4
6265720	1	36	3	2	1	6	1	4	4	5	4	0	1	0	1	0	0	1	4	3	4	2	4	4	5	5	5	4	4	5	4	4	4	4	5	4	4	4	4
6265674	1	31	3	3	1	7	1	2	4	4	4	0	1	0	0	0	0	2	4	4	5	4	4	4	5	4	4	4	4	4	5	4	4	5	4	5	5	4	4
6263968	2	35	3	1	1	5	1	3	4	5	4	0	1	0	0	0	0	2	4	5	4	5	5	4	5	5	4	3	4	5	5	4	3	4	5	3	4	3	4
6263910	1	36	3	1	1	8	1	5	4	4	3	0	1	0	0	1	0	1	4	4	5	4	5	4	5	4	4	4	4	3	4	5	4	4	5	4	5	4	4
6264590	1	33	3	2	2	5	1	5	4	4	3	0	1	0	0	0	0	3	4	5	4	4	5	4	5	5	5	4	4	3	5	4	4	4	5	5	5	3	4
6263574	2	29	3	1	0	7	1	5	4	4	5	0	1	0	0	0	0	4	5	4	5	4	5	4	5	4	5	4	5	4	4	4	5	5	4	4	4	4	5
6263600	1	34	2	2	1	8	1	4	4	5	4	0	0	0	0	1	1	7	4	4	5	5	5	5	5	4	4	4	4	5	5	4	4	4	4	5	4	4	4
6283817	1	32	3	1	1	7	2	N/A	N/A	N/A	N/A	N/A	N/A	N/A	N/A	N/A	N/A	N/A	5	4	4	5	5	4	4	5	4	5	4	5	5	4	4	5	5	4	4	5	5
6382006	1	39	2	3	0	15	1	4	5	5	5	1	0	0	1	0	0	2	4	5	5	5	5	4	5	4	5	4	4	4	5	5	5	5	5	5	5	4	5
6381939	1	36	5	1	1	2	1	5	4	4	4	1	0	0	0	0	0	4	4	4	4	5	5	5	5	4	4	4	4	4	4	5	4	4	5	4	3	2	2
6381717	1	39	3	2	1	10	2	N/A	N/A	N/A	N/A	N/A	N/A	N/A	N/A	N/A	N/A	N/A	3	4	4	4	4	4	4	4	4	3	4	3	4	4	3	4	4	3	4	4	3
6381688	1	28	3	1	1	1	1	4	5	4	5	1	1	0	1	1	1	1	1	3	2	4	2	5	4	5	1	3	3	2	4	3	3	4	1	3	1	5	3
6383172	1	20	2	2	1	3	1	5	1	3	5	1	0	0	1	1	0	7	3	4	4	3	5	3	2	4	1	4	4	4	3	3	3	2	4	4	1	3	5
6383225	1	40	3	3	1	5	1	5	4	5	4	0	1	0	1	0	0	2	5	4	5	4	5	4	5	4	5	4	5	4	5	4	5	4	5	4	5	4	5
6381923	1	23	3	2	1	3	1	3	4	2	3	0	0	0	1	0	0	3	2	3	5	3	5	4	4	3	4	5	4	5	4	3	2	4	4	3	4	5	3
6381764	1	49	3	2	1	3	1	3	4	5	3	0	1	0	0	0	0	2	3	4	4	4	3	4	5	4	4	3	4	3	4	3	4	3	3	2	2	2	3
6381460	1	32	3	2	1	4	1	4	4	5	5	0	1	1	0	0	0	3	4	5	5	4	4	5	4	5	5	4	4	5	5	4	4	5	5	4	5	4	4
6382367	1	26	1	1	0	2	1	3	1	2	3	0	0	0	0	0	1	1	3	4	4	4	4	4	4	4	3	5	3	3	1	3	4	3	5	5	5	3	3
6381952	1	31	2	1	1	5	1	4	5	5	5	0	1	1	0	0	0	1	3	4	5	3	4	5	5	5	3	5	4	3	5	1	1	3	1	3	5	5	1
6383715	1	44	3	2	1	10	1	4	4	3	4	0	1	0	0	0	0	2	4	5	5	4	5	4	4	4	3	4	4	3	3	4	5	4	4	3	4	4	3
6382557	1	34	5	3	1	7	1	4	4	2	4	1	1	0	0	0	0	3	4	3	3	5	3	4	4	3	3	2	4	3	4	5	5	5	4	4	3	4	5
6383614	1	39	4	2	1	10	1	3	4	4	3	0	1	0	0	0	0	5	4	5	5	4	3	4	4	5	4	5	4	3	4	2	3	4	3	4	3	4	4
6382843	1	25	4	2	0	3	1	4	4	4	4	0	0	0	0	1	1	1	4	4	5	5	4	3	4	4	5	3	4	4	5	5	5	4	3	4	5	4	4
6383161	1	30	3	2	1	3	1	5	4	3	3	1	1	0	0	0	0	2	5	3	4	3	4	4	3	4	5	2	4	4	3	4	3	4	3	4	5	3	4
6383017	1	31	2	2	1	5	1	3	3	4	4	0	1	1	0	0	0	1	3	4	4	4	3	4	5	4	3	4	4	4	4	5	3	3	4	5	3	5	2
6382689	1	30	3	2	1	5	1	2	4	3	2	0	1	0	0	1	1	3	5	5	4	4	5	3	5	4	4	4	4	4	5	5	5	4	3	2	3	2	4
6382690	2	28	2	2	1	3	1	3	3	4	4	0	1	0	0	0	0	3	4	4	5	4	4	4	4	4	4	3	4	4	3	3	4	4	4	3	4	4	3
6381647	1	24	3	1	1	2	2	N/A	N/A	N/A	N/A	N/A	N/A	N/A	N/A	N/A	N/A	N/A	4	5	3	3	4	4	4	3	3	5	3	3	4	4	3	3	4	2	3	4	4
6381553	1	45	4	1	1	13	1	4	4	4	4	0	1	0	0	0	1	4	3	4	4	4	3	3	3	4	2	3	4	3	3	3	4	3	2	3	2	2	2
6381262	1	35	3	3	1	5	1	4	4	4	3	1	0	0	0	0	1	2	4	3	4	4	4	3	3	4	4	4	4	3	3	4	4	4	4	3	3	4	4
6381202	2	36	2	1	1	8	1	4	4	4	4	1	0	1	0	1	0	3	3	4	4	4	3	4	4	3	4	4	3	4	4	4	4	4	3	4	4	3	4
6381145	1	26	3	1	1	4	1	2	4	4	3	0	1	0	0	0	0	4	4	5	5	4	4	4	4	5	3	5	5	4	4	5	5	5	5	4	3	4	4
6381132	1	22	2	2	1	1	1	4	4	4	4	1	1	0	0	0	0	1	3	3	4	4	4	3	4	4	4	3	5	5	4	4	4	3	4	2	4	3	4
6381153	1	33	3	2	1	3	1	4	5	4	4	1	0	0	0	0	0	3	4	4	3	4	4	4	4	5	4	3	4	3	4	4	4	4	3	3	3	4	5
6380980	1	44	3	3	2	12	1	4	4	4	3	0	1	0	0	0	0	2	4	4	4	3	4	3	3	4	4	4	4	4	5	4	3	3	4	4	3	4	4
6380946	2	46	3	3	1	3	1	5	5	4	4	0	0	0	0	1	1	2	4	5	4	4	5	3	3	2	4	4	4	3	4	4	5	4	3	3	4	5	5
6380913	1	34	3	2	1	11	2	N/A	N/A	N/A	N/A	N/A	N/A	N/A	N/A	N/A	N/A	N/A	4	5	4	5	3	5	5	4	4	5	5	3	5	3	3	3	3	5	3	4	3
6380850	1	35	3	3	1	8	1	5	4	5	4	0	1	0	0	0	0	5	4	5	4	4	5	4	4	5	5	4	4	5	4	5	5	4	4	5	5	4	4

## Sheet: Processed data (N = 225)
ID	Gender	Age	Edu	Entrepreneurial attempts	Successful ventures	Pre-entrepreneurial work experience	Event Exposure	ED_1	ED_2	ED_3	ED_4	Event spatial proximity_1	Event spatial proximity_2	Event spatial proximity_3	Event spatial proximity_4	Event spatial proximity_5	Event spatial proximity_6	Event duration	EXR_1	EXR_2	EXR_3	EXR_4	EXR_5	EXL_1	EXL_2	EXL_3	EXL_4	EXL_5	ER_1	ER_2	ER_3	ER_4	ER_5	ER_6	ER_7	ER_8	ER_9	ER_10	ER_11	ED_aveg	EXR_aveg	EXL_aveg	ER_aveg	Event spatial proximity_sum	Event spatial proximity_01
6364492	1	0	1	2	1	0	1	3	3	3	3	1	-1	0	1	0	0	1	3	4	5	4	4	5	4	5	4	5	4	4	3	3	4	3	4	4	4	5	5	3	4	4.6	3.90909	1	1
6364506	0	1	1	0	1	2	1	4	4	4	5	0	-1	0	0	0	0	0	4	5	4	5	4	4	5	5	4	5	4	5	5	4	4	4	5	4	5	5	4	4.25	4.4	4.6	4.45455	-1	0
6364060	1	1	1	0	1	1	1	4	4	5	4	0	0	0	1	0	0	1	4	5	5	4	4	5	5	4	5	4	4	5	5	4	4	4	5	5	5	4	4	4.25	4.4	4.6	4.45455	1	1
6363642	1	0	1	0	1	1	1	4	4	3	4	0	-1	0	0	0	0	0	3	4	4	3	4	4	4	4	3	5	4	3	4	4	4	3	4	5	2	3	4	3.75	3.6	4	3.63636	-1	0
6364031	1	1	0	0	0	2	1	4	3	4	4	0	-1	0	1	-1	1	0	3	3	3	4	4	4	4	4	3	4	3	3	4	3	3	3	3	3	2	3	4	3.75	3.4	3.8	3.09091	0	1
6363590	1	0	0	0	0	0	1	2	3	2	2	1	-1	0	0	0	1	0	3	3	4	4	3	4	4	3	3	3	5	4	3	3	3	3	5	4	5	4	3	2.25	3.4	3.4	3.81818	1	1
6363563	1	0	1	1	0	0	1	4	3	4	3	0	0	0	1	0	0	0	4	4	4	3	4	3	4	3	4	3	4	4	3	3	4	4	3	4	2	3	4	3.5	3.8	3.4	3.45455	1	1
6363873	0	0	1	1	1	0	1	5	4	4	5	0	-1	0	0	-1	1	1	4	4	5	5	5	4	4	5	4	4	4	4	5	4	4	4	4	5	4	5	5	4.5	4.6	4.2	4.36364	-1	0
6363198	0	0	0	0	1	1	1	2	5	5	4	0	-1	0	0	-1	0	0	4	4	5	5	5	4	5	4	4	3	4	3	4	3	5	4	3	5	3	5	4	4	4.6	4	3.90909	-2	0
6362988	1	0	2	1	1	0	1	4	5	4	5	1	0	0	0	0	1	1	5	4	5	5	4	5	4	4	5	2	4	4	5	4	5	4	5	5	4	5	5	4.5	4.6	4	4.54545	2	1
6362684	1	2	1	2	2	2	1	3	4	4	3	1	0	-1	1	0	0	1	4	4	5	4	4	4	4	4	3	4	4	3	4	4	4	3	4	3	4	4	3	3.5	4.2	3.8	3.63636	1	1
6363398	0	0	0	0	1	1	1	2	4	3	4	1	-1	0	0	0	0	0	3	4	4	2	4	3	4	4	4	3	3	3	3	2	3	3	3	2	1	3	3	3.25	3.4	3.6	2.63636	0	1
6363391	1	0	1	0	1	0	1	5	3	4	5	0	-1	0	0	0	0	0	3	5	5	5	5	5	5	5	5	5	5	4	5	5	5	5	5	5	5	5	5	4.25	4.6	5	4.90909	-1	0
6361993	0	1	1	2	2	1	1	3	5	4	4	0	-1	0	1	0	1	0	4	5	4	4	5	4	5	4	5	5	3	4	5	3	4	3	4	5	3	3	3	4	4.4	4.6	3.63636	1	1
6362229	1	1	1	2	2	2	1	2	4	2	1	0	-1	0	0	0	0	1	4	5	4	4	5	5	2	3	5	2	4	4	5	4	4	5	3	4	5	4	3	2.25	4.4	3.4	4.09091	-1	0
6362217	1	2	0	1	1	2	1	4	5	5	5	1	0	0	1	0	0	0	3	3	3	2	4	4	4	4	4	4	4	3	4	4	3	4	3	4	4	3	3	4.75	3	4	3.54545	2	1
6362190	1	0	1	1	1	1	1	3	4	5	4	0	0	0	0	-1	1	0	3	4	4	5	4	3	4	4	5	4	4	3	5	4	4	3	4	5	4	3	4	4	4	4	3.90909	0	1
6361625	1	0	2	1	1	0	1	4	5	4	5	0	0	-1	0	-1	0	1	4	5	5	4	3	4	5	4	5	5	4	3	5	4	5	4	5	4	3	4	5	4.5	4.2	4.6	4.18182	-2	0
6361599	1	0	1	0	1	1	1	4	4	5	4	0	0	0	1	0	0	0	4	5	5	4	4	4	5	4	4	5	4	4	5	4	4	4	5	4	4	5	4	4.25	4.4	4.4	4.27273	1	1
6361491	1	0	1	0	1	0	1	3	5	4	4	0	0	0	0	0	1	1	4	5	4	4	4	3	3	4	4	3	4	5	4	4	5	4	4	5	3	3	4	4	4.2	3.4	4.09091	1	1
6361498	1	1	1	1	2	2	1	4	4	4	5	0	0	0	0	0	1	1	3	4	5	4	4	4	5	5	4	5	4	4	5	5	4	4	4	5	5	4	5	4.25	4	4.6	4.45455	1	1
6361484	1	0	1	1	1	0	1	4	4	3	3	0	0	0	1	0	0	0	4	5	5	5	4	4	4	4	5	4	4	5	5	5	5	4	4	5	4	4	4	3.5	4.6	4.2	4.45455	1	1
6360210	0	2	0	1	1	1	1	5	5	5	5	0	-1	0	0	-1	1	0	4	4	5	4	4	5	4	4	4	4	5	4	5	5	5	5	5	4	5	5	4	5	4.2	4.2	4.72727	-1	0
6360519	1	0	1	1	1	0	1	4	4	3	4	1	-1	0	0	0	1	1	3	4	4	3	4	4	4	4	5	5	5	4	4	4	4	4	3	3	3	4	4	3.75	3.6	4.4	3.81818	1	1
6359136	0	2	0	1	2	0	1	2	4	5	2	0	0	0	0	-1	1	1	4	5	5	3	4	4	3	4	4	5	3	4	5	4	4	5	4	4	2	4	2	3.25	4.2	4	3.72727	0	1
6359111	1	0	1	2	1	0	1	4	4	4	4	0	-1	0	1	0	1	0	4	4	4	4	4	4	5	5	4	4	4	4	4	4	4	4	4	4	2	4	4	4	4	4.4	3.81818	1	1
6358917	1	0	1	1	0	1	1	4	4	4	4	0	-1	0	0	0	1	0	4	4	4	4	4	5	4	4	4	4	4	3	4	3	4	4	3	3	4	3	4	4	4	4.2	3.54545	0	1
6358975	1	0	1	0	1	0	1	4	5	4	5	0	0	-1	0	0	0	1	3	4	5	4	4	3	4	4	5	4	4	3	4	3	3	3	4	4	3	4	4	4.5	4	4	3.54545	-1	0
6358750	1	1	2	1	2	2	1	5	4	3	4	0	0	0	0	-1	1	1	5	4	5	5	5	4	4	5	5	5	5	4	4	5	4	4	4	5	5	5	4	4	4.8	4.6	4.45455	0	1
6358176	1	0	0	0	1	0	1	4	4	3	4	1	-1	0	0	0	0	1	3	4	4	4	4	5	4	4	4	5	4	3	5	4	4	3	4	3	3	3	3	3.75	3.8	4.4	3.54545	0	1
6358497	1	1	1	1	1	0	1	5	4	5	3	0	0	0	1	0	0	1	4	4	4	5	4	5	5	5	4	4	4	3	4	3	4	4	3	4	3	4	3	4.25	4.2	4.6	3.54545	1	1
6358035	1	1	1	2	2	1	1	4	4	4	4	0	-1	0	1	0	0	0	5	5	5	3	4	4	4	5	5	4	2	2	5	3	3	3	4	4	3	4	2	4	4.4	4.4	3.18182	0	1
6357984	0	0	1	1	0	0	1	3	4	5	4	0	-1	0	0	0	1	0	4	5	5	2	3	4	5	5	1	4	4	3	5	2	4	5	5	3	2	1	4	4	3.8	3.8	3.45455	0	1
6357938	1	1	0	1	1	0	1	3	5	5	4	0	-1	0	0	0	0	1	3	4	4	5	4	4	5	4	4	4	4	4	3	5	3	4	4	5	4	5	3	4.25	4	4.2	4	-1	0
6357332	1	0	1	1	1	0	1	1	2	1	1	0	-1	0	0	0	0	0	5	4	4	4	5	5	5	4	5	5	4	4	5	5	5	5	4	4	5	4	4	1.25	4.4	4.8	4.45455	-1	0
6357107	1	1	1	1	1	1	1	2	3	4	3	1	0	0	0	0	0	1	3	3	4	3	4	2	3	4	5	3	5	4	4	5	4	4	5	4	3	5	4	3	3.4	3.4	4.27273	1	1
6356665	1	0	1	2	0	0	1	4	4	4	4	0	-1	0	0	0	1	1	3	4	4	3	4	4	4	4	4	4	4	5	4	4	5	4	4	5	4	3	1	4	3.6	4	3.90909	0	1
6357032	1	0	1	0	1	0	1	2	3	2	3	0	0	0	0	-1	1	1	2	4	4	3	4	4	4	4	3	5	4	3	4	3	3	4	4	3	2	3	3	2.5	3.4	4	3.27273	0	1
6356829	0	0	1	1	1	0	1	3	4	3	3	1	0	0	1	-1	0	0	3	4	4	3	4	3	4	4	3	4	3	4	4	4	5	4	3	3	2	4	3	3.25	3.6	3.6	3.54545	1	1
6356058	1	0	1	1	2	0	1	3	4	4	4	1	0	0	0	0	0	0	3	3	4	3	3	4	4	3	3	4	4	4	3	3	3	4	4	3	4	4	3	3.75	3.2	3.6	3.54545	1	1
6355828	1	1	1	1	1	1	1	3	4	3	3	0	-1	0	0	0	0	1	4	3	4	3	4	5	5	5	4	4	4	4	4	4	5	4	5	5	3	4	4	3.25	3.6	4.6	4.18182	-1	0
6355035	0	0	0	1	1	0	1	3	4	3	4	0	0	0	1	0	0	1	5	5	4	4	4	4	4	3	2	5	4	2	4	4	4	4	5	5	4	5	3	3.5	4.4	3.6	4	1	1
6354612	1	0	0	0	1	1	1	4	4	4	5	0	0	0	0	-1	1	0	5	5	5	4	4	4	4	4	4	5	5	5	5	5	5	4	4	5	3	4	5	4.25	4.6	4.2	4.54545	0	1
6354435	1	0	1	2	1	0	1	5	4	5	5	0	0	0	1	0	1	0	4	3	4	3	4	4	4	3	2	4	3	2	4	4	4	4	4	5	2	3	4	4.75	3.6	3.4	3.54545	2	1
6354353	0	0	2	1	1	0	1	3	5	4	4	0	0	0	1	0	0	1	3	3	4	3	4	4	3	3	4	3	4	2	3	3	3	4	3	3	4	3	4	4	3.4	3.4	3.27273	1	1
6354771	1	0	0	1	2	1	1	3	4	3	4	0	-1	0	0	0	0	1	2	2	2	2	3	4	4	4	4	4	3	3	4	4	3	3	4	4	3	3	3	3.5	2.2	4	3.36364	-1	0
6353639	0	0	1	1	2	1	1	3	5	5	2	1	-1	0	0	0	0	0	5	5	5	5	5	5	5	5	5	4	5	5	5	5	5	5	5	5	4	5	3	3.75	5	4.8	4.72727	0	1
6352705	1	0	1	0	1	0	1	3	4	3	3	0	-1	0	0	0	0	1	3	4	4	2	4	4	4	4	4	4	4	3	4	4	4	4	4	4	3	4	4	3.25	3.4	4	3.81818	-1	0
6352699	1	0	2	1	2	0	1	3	5	4	3	0	0	0	0	-1	1	0	4	5	5	4	5	4	5	3	3	5	5	5	4	5	5	4	5	4	4	3	5	3.75	4.6	4	4.45455	0	1
6352431	1	0	2	1	1	0	1	3	4	4	3	1	0	0	1	0	1	0	3	4	4	3	4	4	3	4	4	3	3	4	3	3	3	3	3	3	2	2	3	3.5	3.6	3.6	2.90909	3	1
6352367	1	0	1	0	1	1	1	4	4	4	4	1	-1	0	0	0	0	0	2	3	4	4	4	3	4	4	4	4	5	4	4	5	5	4	4	3	4	4	4	4	3.4	3.8	4.18182	0	1
6352161	1	0	1	1	1	0	1	4	5	4	3	0	-1	0	0	-1	1	0	4	4	3	2	4	4	4	4	4	4	3	2	4	4	4	3	3	2	2	4	4	4	3.4	4	3.18182	-1	0
6352080	1	1	2	2	1	0	1	4	5	5	4	1	-1	0	0	0	0	1	4	5	4	5	4	5	5	4	5	4	4	4	5	5	4	4	5	4	4	5	5	4.5	4.4	4.6	4.45455	0	1
6352069	1	1	2	0	1	2	1	5	4	5	4	0	-1	0	0	0	0	0	4	3	4	4	5	3	4	5	3	4	4	3	4	4	3	3	3	4	2	3	4	4.5	4	3.8	3.36364	-1	0
6351455	0	0	1	1	1	0	1	2	3	3	3	0	-1	0	0	0	1	0	4	3	4	4	3	4	4	4	4	4	4	3	3	4	4	4	4	4	3	4	3	2.75	3.6	4	3.63636	0	1
6351987	1	1	2	1	1	2	1	3	4	4	3	0	0	0	0	-1	1	1	4	5	5	4	5	5	5	5	5	5	4	4	4	4	4	4	4	5	3	4	5	3.5	4.6	5	4.09091	0	1
6351835	1	0	1	1	0	0	1	4	4	5	5	0	-1	0	0	0	0	1	2	3	3	4	4	4	4	4	3	4	4	4	4	4	4	3	3	4	4	3	4	4.5	3.2	3.8	3.72727	-1	0
6349850	1	2	2	1	2	2	1	4	4	4	4	1	0	0	0	-1	1	1	4	4	4	5	4	3	4	3	5	3	3	4	4	4	5	4	4	3	3	2	3	4	4.2	3.6	3.54545	1	1
6349856	1	0	2	1	2	1	1	3	5	4	4	0	0	0	1	0	0	1	4	5	5	3	4	5	5	4	4	5	5	4	4	5	5	4	3	5	5	4	4	4	4.2	4.6	4.36364	1	1
6349001	1	2	0	1	2	2	1	2	5	4	4	0	0	0	0	0	1	1	5	4	5	4	5	5	5	5	4	5	4	5	4	4	5	4	5	5	4	4	5	3.75	4.6	4.8	4.45455	1	1
6349477	1	1	2	0	1	0	1	4	5	5	5	0	-1	0	0	0	0	1	5	3	2	2	2	3	4	5	3	2	5	5	5	5	5	5	1	1	1	1	1	4.75	2.8	3.4	3.18182	-1	0
6349411	1	0	1	1	1	0	1	3	4	2	1	1	0	0	0	0	0	0	4	4	3	3	4	4	3	4	4	3	4	3	3	3	4	4	3	3	4	3	4	2.5	3.6	3.6	3.45455	1	1
6349401	1	1	1	2	1	1	1	4	4	4	4	1	-1	0	1	0	0	0	4	4	3	2	4	5	5	5	5	4	3	2	4	4	5	4	4	2	2	2	2	4	3.4	4.8	3.09091	1	1
6349353	1	0	1	0	1	0	1	2	4	4	2	1	0	0	0	0	0	1	2	2	3	2	3	3	3	4	2	3	3	4	4	3	4	4	4	4	4	4	4	3	2.4	3	3.81818	1	1
6349333	1	1	0	2	1	2	1	4	4	4	4	1	0	0	0	0	1	0	4	4	4	4	4	4	3	4	4	4	3	2	4	4	4	3	4	2	4	4	3	4	4	3.8	3.36364	2	1
6348569	1	0	1	1	1	0	1	1	4	4	4	1	0	0	1	0	0	0	3	3	5	5	4	4	5	4	4	4	5	3	4	5	4	4	5	4	4	4	5	3.25	4	4.2	4.27273	2	1
6348329	0	2	0	1	1	2	1	5	5	5	5	1	0	0	0	0	0	0	4	4	5	4	4	5	4	5	4	4	4	4	5	4	4	4	4	5	4	5	5	5	4.2	4.4	4.36364	1	1
6347563	0	0	1	2	2	0	1	4	4	3	3	0	-1	0	1	0	0	0	4	4	4	3	4	3	4	5	4	3	4	4	3	3	4	3	3	2	2	4	4	3.5	3.8	3.8	3.27273	0	1
6347291	1	1	0	0	1	1	1	2	3	4	5	0	-1	0	0	0	0	1	3	4	5	5	5	5	5	5	5	5	5	4	4	4	3	4	4	3	3	5	3	3.5	4.4	5	3.81818	-1	0
6346943	1	0	1	0	0	2	1	2	1	1	2	0	-1	0	0	0	0	0	2	4	4	2	3	4	4	4	4	5	4	3	1	4	4	5	5	4	2	4	3	1.5	3	4.2	3.54545	-1	0
6346784	1	1	1	1	1	0	1	2	4	3	4	0	-1	0	0	-1	0	1	4	2	4	3	4	4	5	4	5	3	4	5	3	4	5	5	4	3	5	4	4	3.25	3.4	4.2	4.18182	-2	0
6346365	0	1	1	1	1	1	1	4	4	3	3	0	0	0	0	-1	1	0	3	4	4	3	4	4	4	4	3	4	4	4	4	4	4	4	4	4	3	4	4	3.5	3.6	3.8	3.90909	0	1
6346330	1	0	1	1	1	0	1	2	3	4	4	0	0	0	1	0	1	0	4	4	4	3	3	3	2	2	3	4	4	3	4	3	2	3	4	4	2	4	3	3.25	3.6	2.8	3.27273	2	1
6346285	1	0	1	1	0	1	1	2	4	3	3	0	0	0	0	0	1	1	5	4	4	4	4	5	5	5	4	3	5	5	5	5	5	3	5	5	5	5	5	3	4.2	4.4	4.81818	1	1
6346227	1	1	1	0	1	1	1	2	3	4	4	0	0	0	1	0	0	1	4	3	4	3	3	4	4	5	4	4	4	2	3	3	4	4	3	3	4	3	3	3.25	3.4	4.2	3.27273	1	1
6345921	0	0	0	1	1	0	1	1	2	3	2	0	-1	0	1	0	0	0	2	4	4	4	4	2	3	3	4	4	3	3	3	3	3	4	4	4	4	4	4	2	3.6	3.2	3.54545	0	1
6345149	1	0	1	0	0	0	1	1	4	4	1	0	-1	0	0	0	0	1	2	2	3	2	3	3	2	2	3	3	3	2	4	4	4	3	2	3	2	3	3	2.5	2.4	2.6	3	-1	0
6345506	1	0	0	0	0	0	1	4	4	4	4	0	0	0	0	-1	1	1	3	4	4	4	4	4	3	3	4	4	2	3	3	2	3	3	4	4	3	4	4	4	3.8	3.6	3.18182	0	1
6345400	1	1	1	1	1	1	1	5	4	4	4	0	-1	0	0	0	1	1	1	3	4	3	3	3	5	4	4	4	5	4	5	5	5	5	5	5	4	4	4	4.25	2.8	4	4.63636	0	1
6344065	1	1	0	1	1	2	1	3	4	4	4	0	-1	0	0	0	0	1	5	4	5	5	5	5	5	4	4	4	5	2	4	4	4	4	4	4	3	4	5	3.75	4.8	4.4	3.90909	-1	0
6343883	1	1	1	1	1	0	1	4	5	4	4	0	-1	0	0	0	0	1	3	5	4	2	4	4	3	5	4	3	4	4	3	3	4	4	3	3	2	3	4	4.25	3.6	3.8	3.36364	-1	0
6343937	0	0	1	1	1	0	1	5	4	4	5	0	-1	0	0	0	1	0	4	5	5	5	5	5	5	5	4	5	4	5	5	5	5	5	5	5	4	5	5	4.5	4.8	4.8	4.81818	0	1
6345020	1	1	1	1	1	1	1	2	2	2	4	1	-1	0	1	0	0	0	5	4	4	4	5	4	5	4	4	3	3	4	4	4	5	4	4	5	5	4	3	2.5	4.4	4	4.09091	1	1
6343680	0	2	0	2	2	0	1	5	4	3	4	0	0	0	1	0	0	0	3	4	5	3	5	4	4	5	5	4	4	4	5	4	4	3	4	4	3	4	5	4	4	4.4	4	1	1
6343672	1	2	1	1	1	1	1	3	3	4	4	1	0	0	0	0	0	1	4	4	5	3	4	4	5	5	5	5	3	4	4	4	4	4	4	2	5	5	5	3.5	4	4.8	4	1	1
6343603	1	1	1	2	2	0	1	4	3	3	4	1	-1	0	0	0	0	1	4	5	5	5	4	4	3	4	4	4	4	3	4	4	4	5	4	5	4	4	5	3.5	4.6	3.8	4.18182	0	1
6343536	1	0	1	1	1	0	1	3	4	4	3	0	0	0	1	0	0	1	5	5	4	5	4	5	5	4	4	5	5	4	4	5	5	4	5	4	4	5	5	3.5	4.6	4.6	4.54545	1	1
6343517	1	0	2	1	1	1	1	4	4	4	5	0	-1	0	0	0	0	0	4	4	4	4	3	3	4	4	4	4	4	4	4	4	4	4	4	4	3	4	4	4.25	3.8	3.8	3.90909	-1	0
6342595	1	1	0	2	2	0	1	4	2	2	3	1	0	0	1	0	1	1	4	5	5	5	4	5	5	5	5	5	5	4	5	5	4	5	5	4	5	5	5	2.75	4.6	5	4.72727	3	1
6341305	0	0	1	1	1	0	1	4	4	4	4	0	0	0	0	0	1	1	4	3	4	3	3	4	4	4	4	4	4	3	4	4	4	4	4	4	4	4	5	4	3.4	4	4	1	1
6340997	0	1	0	2	1	1	1	3	4	3	2	1	0	0	0	0	0	0	4	5	5	3	2	4	4	4	5	4	4	4	5	4	4	4	5	4	4	4	5	3	3.8	4.2	4.27273	1	1
6340952	1	0	1	0	0	0	1	5	4	4	4	0	-1	-1	0	-1	1	1	4	4	4	3	3	4	4	3	4	3	3	2	4	3	3	3	4	2	3	3	2	4.25	3.6	3.6	2.90909	-2	0
6339097	1	0	0	0	0	0	1	4	5	5	4	0	0	0	0	0	1	0	4	3	3	4	2	4	3	3	3	4	4	4	4	5	5	5	3	4	5	5	4	4.5	3.2	3.4	4.36364	1	1
6338374	0	0	2	1	2	0	1	3	4	5	4	0	0	0	0	0	1	1	5	4	5	5	3	5	4	5	4	5	4	5	4	5	5	4	3	4	3	5	5	4	4.4	4.6	4.27273	1	1
6338303	0	0	0	1	1	1	1	4	4	3	5	1	-1	0	0	0	0	0	4	3	3	2	4	4	4	3	3	3	4	4	3	5	4	4	4	4	3	3	4	4	3.2	3.4	3.81818	0	1
6336453	0	0	1	1	1	1	1	3	4	4	4	1	-1	0	0	0	1	1	3	4	4	4	4	4	4	4	4	4	3	2	3	3	3	3	3	3	2	4	4	3.75	3.8	4	3	1	1
6332645	1	0	1	0	1	0	1	4	2	3	3	0	0	0	1	-1	0	0	4	5	5	5	5	4	4	4	5	5	4	4	5	3	3	4	4	4	3	3	5	3	4.8	4.4	3.81818	0	1
6331877	0	1	1	1	2	1	1	3	5	4	4	0	-1	0	0	0	0	1	4	4	5	4	5	5	5	4	3	3	4	5	3	4	5	4	5	5	4	5	4	4	4.4	4	4.36364	-1	0
6331762	0	0	1	1	1	0	1	3	4	3	4	0	-1	0	0	0	0	1	4	4	5	4	5	4	5	5	5	3	4	5	5	4	4	4	5	5	4	5	4	3.5	4.4	4.4	4.45455	-1	0
6331288	1	2	1	1	1	2	1	4	4	4	4	0	-1	0	0	0	1	0	4	4	4	3	4	4	4	4	4	4	4	3	4	4	4	4	4	4	3	4	3	4	3.8	4	3.72727	0	1
6331002	1	1	2	0	1	2	1	4	4	4	4	1	-1	0	0	0	1	1	4	4	4	4	4	4	4	5	5	3	4	4	4	4	4	4	4	4	3	3	4	4	4	4.2	3.81818	1	1
6330427	0	0	2	0	1	0	1	5	2	3	4	1	0	0	0	-1	0	0	4	5	4	4	4	4	5	4	4	3	5	4	4	5	4	5	5	4	5	4	4	3.5	4.2	4	4.45455	0	1
6329883	0	2	0	1	1	2	1	3	3	3	4	0	0	-1	0	0	0	1	2	3	2	2	3	3	4	3	3	3	3	2	3	4	4	2	3	2	2	2	2	3.25	2.4	3.2	2.63636	-1	0
6328237	0	0	1	1	2	0	1	5	4	5	3	1	0	0	1	-1	0	1	4	4	5	4	5	4	4	5	5	4	5	4	4	5	5	4	5	3	4	4	4	4.25	4.4	4.4	4.27273	1	1
6323769	1	0	1	1	0	0	1	4	5	5	5	0	-1	0	1	0	0	1	4	4	3	5	5	4	4	3	3	3	3	4	4	3	2	2	3	4	4	3	3	4.75	4.2	3.4	3.18182	0	1
6284494	1	2	2	2	2	2	1	4	4	3	4	0	-1	0	0	0	0	0	4	4	3	4	3	4	3	4	3	4	4	3	4	3	3	4	3	4	3	4	3	3.75	3.6	3.6	3.45455	-1	0
6321647	1	1	1	1	1	2	1	5	5	1	2	0	0	0	1	0	0	0	4	1	5	5	4	3	4	2	4	5	4	3	4	5	4	3	4	4	5	4	5	3.25	3.8	3.6	4.09091	1	1
6320591	1	2	0	1	1	1	1	3	4	4	5	0	0	0	0	0	1	1	4	5	5	4	5	4	5	4	4	5	5	4	5	4	4	4	5	5	4	3	4	4	4.6	4.4	4.27273	1	1
6320525	1	0	1	1	0	0	1	4	4	4	5	1	0	0	0	0	0	1	4	4	5	4	4	4	4	4	5	3	4	5	5	5	4	5	5	5	4	4	5	4.25	4.2	4	4.63636	1	1
6320264	1	1	0	0	1	1	1	3	4	2	2	0	-1	0	1	0	0	0	4	5	5	4	4	5	5	5	4	4	4	4	4	4	5	4	4	5	3	4	4	2.75	4.4	4.6	4.09091	0	1
6315712	0	0	0	1	1	0	1	1	5	5	3	0	-1	-1	0	0	1	0	3	5	5	5	5	5	4	5	5	5	5	5	5	5	5	5	5	5	4	5	5	3.5	4.6	4.8	4.90909	-1	0
6316318	1	1	1	1	1	2	1	3	4	5	4	0	-1	0	1	-1	1	0	4	4	4	4	4	4	2	2	2	2	4	4	4	4	4	4	4	4	3	4	4	4	4	2.4	3.90909	0	1
6316155	0	0	2	0	1	1	1	4	4	4	4	0	-1	0	1	0	0	1	4	4	5	4	4	4	4	4	4	5	4	4	5	4	4	5	4	2	4	4	4	4	4.2	4.2	4	0	1
6314196	1	0	1	1	1	0	1	4	4	3	4	0	0	0	1	0	0	0	5	4	5	4	4	5	4	4	5	4	5	4	5	5	4	5	5	4	5	4	4	3.75	4.4	4.4	4.54545	1	1
6314090	1	2	2	2	2	0	1	4	5	4	4	0	-1	0	0	0	0	0	5	4	4	4	4	5	4	4	5	4	4	5	4	4	4	5	4	4	5	5	4	4.25	4.2	4.4	4.36364	-1	0
6314827	1	1	1	1	2	2	1	4	5	5	4	0	-1	0	0	0	0	0	4	4	4	5	4	5	4	4	5	4	4	4	3	4	3	4	4	5	4	4	3	4.5	4.2	4.4	3.81818	-1	0
6314927	1	1	2	2	2	1	1	4	3	3	5	0	0	0	0	-1	0	0	3	5	4	4	4	3	4	4	4	4	3	3	3	4	2	3	3	4	1	1	5	3.75	4	3.8	2.90909	-1	0
6311834	1	1	1	1	1	0	1	5	5	3	4	0	0	0	1	0	0	1	4	5	4	4	5	5	5	5	4	5	4	4	5	4	5	4	4	3	2	3	4	4.25	4.4	4.8	3.81818	1	1
6311422	0	0	0	0	1	0	1	3	4	4	4	1	0	0	1	0	0	0	4	4	4	3	5	5	5	5	4	4	4	4	4	4	4	4	3	3	3	3	3	3.75	4	4.6	3.54545	2	1
6311904	1	2	1	0	1	2	1	4	4	5	4	0	0	0	1	0	0	0	4	4	5	4	4	4	4	5	4	4	4	4	5	4	4	4	4	5	4	4	4	4.25	4.2	4.2	4.18182	1	1
6309499	1	1	0	1	1	2	1	3	4	4	4	1	0	0	0	0	0	0	3	4	3	2	2	3	2	3	4	4	4	4	3	5	3	4	5	3	2	5	3	3.75	2.8	3.2	3.72727	1	1
6309864	1	1	1	1	1	2	1	4	5	5	4	0	0	0	0	-1	1	1	4	5	5	4	5	4	4	4	5	5	4	4	5	4	4	4	5	4	5	5	5	4.5	4.6	4.4	4.45455	0	1
6309685	1	0	1	1	1	0	1	4	4	5	4	0	-1	0	1	0	1	1	5	4	5	4	4	4	5	4	5	4	5	4	4	4	5	4	5	5	4	4	5	4.25	4.4	4.4	4.45455	1	1
6310747	1	0	2	1	1	0	1	2	4	5	5	0	-1	0	0	0	1	0	4	5	5	4	4	4	4	4	3	4	4	3	4	5	4	4	4	4	3	3	4	4	4.4	3.8	3.81818	0	1
6309235	1	0	1	1	1	0	1	3	4	4	4	0	-1	0	0	-1	0	0	4	4	5	4	5	4	4	5	4	4	4	4	5	4	4	4	4	5	4	4	5	3.75	4.4	4.2	4.27273	-2	0
6305746	1	0	2	1	1	0	1	3	4	3	4	0	0	0	1	-1	0	0	5	5	4	4	5	5	4	5	5	5	5	4	5	4	5	5	5	4	5	5	4	3.5	4.6	4.8	4.63636	0	1
6305689	1	0	1	2	2	0	1	5	4	5	4	1	0	0	1	0	0	1	5	5	4	4	5	5	4	5	5	3	5	4	4	4	5	4	4	5	5	5	5	4.5	4.6	4.4	4.54545	2	1
6302276	0	0	1	1	1	0	1	3	3	3	4	1	-1	0	0	0	1	0	4	4	4	4	5	4	4	4	4	4	4	4	4	4	4	5	5	5	3	4	4	3.25	4.2	4	4.18182	1	1
6302254	0	1	1	1	1	2	1	5	4	4	5	0	-1	0	0	0	0	0	4	5	5	4	4	5	5	4	4	5	4	4	5	5	4	4	5	5	4	5	5	4.5	4.4	4.6	4.54545	-1	0
6298885	0	1	1	2	1	0	1	2	3	2	3	1	0	0	0	0	0	1	4	5	3	3	4	4	4	3	5	4	4	3	4	5	4	4	4	4	5	4	4	2.5	3.8	4	4.09091	1	1
6298529	1	0	2	1	1	0	1	4	4	5	5	0	0	0	1	0	0	0	4	5	4	4	5	4	5	4	5	4	4	5	4	5	4	4	5	4	5	4	5	4.5	4.4	4.4	4.45455	1	1
6297515	1	1	1	0	1	1	1	3	5	4	4	0	0	0	1	0	0	1	4	3	5	4	4	4	4	5	4	4	4	5	5	4	5	4	4	4	3	4	5	4	4	4.2	4.27273	1	1
6297469	1	0	1	1	1	0	1	5	4	4	5	0	0	0	1	0	0	1	4	5	4	4	5	4	4	5	5	4	4	4	4	5	5	5	5	4	4	4	4	4.5	4.4	4.4	4.36364	1	1
6295980	1	1	2	2	2	1	1	4	3	4	3	0	0	0	1	0	0	1	4	3	4	3	4	5	4	3	4	4	4	3	4	5	4	3	4	3	4	5	4	3.5	3.6	4	3.90909	1	1
6295544	0	0	0	0	2	0	1	4	4	4	4	0	0	-1	0	0	0	0	3	4	4	3	3	2	4	4	4	4	4	2	3	4	4	3	4	4	3	3	2	4	3.4	3.6	3.27273	-1	0
6295119	1	0	1	2	2	1	1	5	4	5	4	0	-1	0	1	0	0	0	3	4	4	5	5	3	4	4	4	4	4	3	5	4	4	5	4	4	4	3	5	4.5	4.2	3.8	4.09091	0	1
6294464	0	0	1	1	1	1	1	3	5	4	4	0	0	0	0	-1	1	0	5	4	5	4	4	4	5	4	4	4	4	4	4	4	3	4	4	4	3	4	4	4	4.4	4.2	3.81818	0	1
6294376	1	1	1	2	2	1	1	4	4	3	4	0	-1	-1	0	-1	0	0	4	3	4	3	4	4	4	3	4	4	4	4	4	4	4	4	3	4	4	3	5	3.75	3.6	3.8	3.90909	-3	0
6294330	1	1	2	0	1	1	1	3	4	5	3	0	-1	0	0	0	0	1	4	5	4	3	4	4	3	4	5	4	4	3	4	5	4	4	5	4	3	4	4	3.75	4	4	4	-1	0
6293930	1	0	1	1	1	0	1	3	4	4	5	0	0	0	1	0	0	0	3	4	4	4	5	4	3	4	4	4	4	5	4	4	4	5	3	4	3	4	4	4	4	3.8	4	1	1
6293329	0	0	1	1	1	1	1	3	4	4	4	0	-1	0	1	0	0	0	4	4	5	4	4	4	4	5	4	4	4	5	4	4	4	4	4	4	5	4	4	3.75	4.2	4.2	4.18182	0	1
6292853	0	0	1	1	1	0	1	3	3	4	4	0	-1	0	0	0	1	0	4	4	5	4	4	4	5	4	4	4	4	4	5	4	5	4	5	4	5	4	5	3.5	4.2	4.2	4.45455	0	1
6292683	1	0	1	0	1	0	1	4	4	4	5	1	0	0	0	0	0	1	4	3	4	2	4	3	4	4	3	5	4	3	4	3	3	4	3	4	5	3	4	4.25	3.4	3.8	3.63636	1	1
6292581	1	1	1	0	0	2	1	4	4	4	3	0	-1	0	0	0	0	1	5	4	5	5	4	3	5	4	3	3	5	4	4	4	4	4	5	3	3	4	3	3.75	4.6	3.6	3.90909	-1	0
6292138	0	2	0	1	1	0	1	4	4	3	4	0	-1	0	1	0	0	1	3	4	4	3	4	5	4	4	5	3	4	4	5	4	4	4	3	4	4	3	4	3.75	3.6	4.2	3.90909	0	1
6292006	1	0	2	1	1	1	1	3	4	5	5	0	-1	0	0	0	0	0	4	4	5	3	4	3	4	4	5	4	4	4	3	2	4	4	3	4	2	3	5	4.25	4	4	3.45455	-1	0
6291122	1	1	2	2	2	0	1	4	5	5	3	0	-1	0	1	0	0	0	4	5	5	4	4	5	5	5	4	5	5	5	5	3	4	4	3	4	5	3	3	4.25	4.4	4.8	4	0	1
6287753	1	0	1	0	0	1	1	3	4	4	5	0	-1	0	0	0	0	1	2	4	4	4	4	4	3	4	5	5	4	3	3	3	3	3	4	4	3	4	3	4	3.6	4.2	3.36364	-1	0
6288760	0	0	1	1	1	0	1	5	5	4	3	0	-1	0	0	0	0	0	5	5	5	5	5	4	4	4	5	4	5	3	4	4	5	5	4	5	4	5	4	4.25	5	4.2	4.36364	-1	0
6288290	0	0	1	0	1	0	1	5	4	5	5	0	-1	0	1	-1	0	1	5	5	5	5	5	4	5	4	3	4	5	4	5	5	5	4	5	2	4	4	5	4.75	5	4	4.36364	-1	0
6287982	0	0	1	2	1	0	1	1	5	1	5	0	-1	0	0	-1	0	0	4	5	5	5	4	5	5	4	5	5	5	4	5	5	5	5	4	5	4	5	2	3	4.6	4.8	4.45455	-2	0
6286781	1	0	1	0	1	0	1	3	4	4	5	0	0	0	0	-1	1	1	4	5	5	4	4	5	5	4	5	4	5	4	5	4	5	4	5	5	4	4	5	4	4.4	4.6	4.54545	0	1
6287164	1	1	1	1	1	1	1	2	3	4	3	0	-1	0	0	0	0	0	3	4	3	4	3	4	4	4	3	3	4	5	4	4	3	4	3	4	5	4	4	3	3.4	3.6	4	-1	0
6286894	1	0	2	1	2	0	1	5	5	5	4	1	-1	0	0	0	1	1	3	4	4	5	4	4	3	3	5	4	4	5	4	4	4	5	4	4	5	4	5	4.75	4	3.8	4.36364	1	1
6285956	1	1	0	0	1	2	1	5	4	5	4	0	0	0	1	0	0	0	4	4	5	4	5	4	4	4	5	4	5	4	5	4	4	5	4	5	4	5	4	4.5	4.4	4.2	4.45455	1	1
6285869	1	1	1	1	1	1	1	4	5	4	4	0	-1	0	0	0	0	0	5	4	4	5	5	4	4	5	5	4	4	3	4	3	3	3	4	5	4	4	4	4.25	4.6	4.4	3.72727	-1	0
6285784	1	0	2	1	1	1	1	4	3	5	4	0	0	0	1	0	0	0	4	5	4	5	4	4	5	4	4	5	4	5	4	5	4	4	5	4	4	5	5	4	4.4	4.4	4.45455	1	1
6285544	1	2	1	2	2	1	1	5	4	4	5	1	0	0	1	0	0	1	4	5	4	5	4	4	4	4	5	4	5	4	4	4	5	4	5	4	5	5	5	4.5	4.4	4.2	4.54545	2	1
6285414	1	0	0	0	1	0	1	4	5	4	4	1	0	0	0	0	0	1	3	4	4	3	4	4	4	3	3	4	4	3	4	3	3	4	4	3	2	2	3	4.25	3.6	3.6	3.18182	1	1
6284901	0	0	1	1	1	0	1	5	5	4	5	0	-1	0	0	0	0	1	5	5	4	5	5	5	4	4	4	4	4	4	4	4	5	4	4	4	4	5	4	4.75	4.8	4.2	4.18182	-1	0
6284826	1	0	2	1	1	1	1	3	2	3	3	0	-1	0	0	0	0	0	4	5	5	5	5	5	4	3	4	3	4	4	5	5	5	4	4	5	4	5	5	2.75	4.8	3.8	4.54545	-1	0
6284778	1	0	1	1	2	0	1	3	4	4	5	0	-1	0	0	0	0	0	5	4	5	5	5	4	4	5	5	4	4	5	5	5	4	4	5	5	4	4	5	4	4.8	4.4	4.54545	-1	0
6284752	0	0	1	1	1	0	1	5	5	4	5	0	0	0	1	0	0	0	5	4	4	5	5	5	4	4	5	4	5	4	4	5	5	4	4	5	4	4	5	4.75	4.6	4.4	4.45455	1	1
6284750	1	0	1	1	1	1	1	3	4	4	4	0	-1	0	0	0	0	0	4	5	5	5	4	4	4	4	4	5	4	4	5	4	4	4	4	5	4	4	4	3.75	4.6	4.2	4.18182	-1	0
6284662	1	0	2	1	1	0	1	5	4	5	4	1	-1	0	0	0	0	0	4	4	5	4	5	4	5	5	5	4	4	4	4	5	5	5	4	5	4	4	4	4.5	4.4	4.6	4.36364	0	1
6284607	1	1	1	1	1	1	1	2	4	3	3	0	-1	0	1	-1	0	1	4	5	5	4	5	4	5	5	4	5	4	4	5	5	4	4	5	5	4	4	5	3	4.6	4.6	4.45455	-1	0
6284539	1	1	2	0	1	2	1	4	5	4	4	1	0	0	1	0	1	0	4	5	5	5	5	4	4	5	4	4	4	4	5	4	4	4	4	5	5	4	3	4.25	4.8	4.2	4.18182	3	1
6284567	1	1	1	0	1	1	1	4	4	5	4	0	-1	0	0	0	0	0	3	5	5	4	4	5	4	5	5	4	4	5	5	4	5	5	4	4	5	4	4	4.25	4.2	4.6	4.45455	-1	0
6286283	1	0	1	1	1	0	1	2	5	4	5	0	0	0	0	-1	1	1	4	5	5	4	5	4	5	4	4	5	4	5	4	4	5	4	5	4	5	4	4	4	4.6	4.4	4.36364	0	1
6284447	1	0	1	0	1	0	1	4	4	4	4	0	-1	0	0	0	0	0	4	4	3	3	4	5	4	4	4	4	4	3	4	4	4	4	5	4	3	4	4	4	3.6	4.2	3.90909	-1	0
6284416	0	1	2	0	0	2	1	5	4	3	3	0	-1	0	1	0	0	0	4	5	5	4	4	3	4	4	5	3	4	5	3	3	4	4	3	5	3	4	5	3.75	4.4	3.8	3.90909	0	1
6284362	0	0	0	0	1	1	1	5	5	5	4	0	0	0	0	-1	1	0	5	4	4	5	4	4	3	5	5	4	4	5	4	4	5	4	5	3	4	4	5	4.75	4.4	4.2	4.27273	0	1
6284122	1	1	1	1	1	2	1	2	4	5	3	0	0	0	1	0	0	0	4	5	5	4	4	3	4	3	4	3	4	4	5	5	4	4	4	5	3	4	5	3.5	4.4	3.4	4.27273	1	1
6284118	0	0	1	1	1	0	1	2	4	3	4	0	0	0	0	0	1	1	4	4	5	4	4	4	5	4	5	4	4	2	4	3	4	4	3	4	3	4	2	3.25	4.2	4.4	3.36364	1	1
6283952	0	0	2	0	1	1	1	2	4	3	3	0	-1	0	0	0	0	0	5	5	4	4	5	4	4	5	4	5	5	4	4	5	5	4	5	5	4	4	5	3	4.6	4.4	4.54545	-1	0
6284024	1	1	1	0	1	2	1	4	4	5	5	0	0	0	1	0	0	0	4	4	5	4	5	3	3	3	4	3	4	4	5	5	4	4	5	4	4	4	5	4.5	4.4	3.2	4.36364	1	1
6283969	1	0	1	0	1	1	1	2	3	4	5	0	-1	0	0	0	0	0	4	3	4	4	5	5	4	4	5	4	4	5	4	4	5	4	5	4	5	4	5	3.5	4	4.4	4.45455	-1	0
6284010	1	0	1	1	1	1	1	4	5	4	5	0	-1	0	0	0	0	1	4	5	4	4	5	4	4	5	4	5	4	5	4	4	5	4	4	5	4	4	5	4.5	4.4	4.4	4.36364	-1	0
6283988	1	1	2	1	2	1	1	2	4	4	4	0	0	0	1	0	0	0	4	5	5	4	4	5	5	5	5	5	4	4	5	4	4	5	4	4	4	5	4	3.5	4.4	5	4.27273	1	1
6283953	1	0	0	0	0	1	1	5	2	1	1	0	0	0	0	-1	1	1	2	1	2	1	2	5	4	5	5	5	4	5	4	4	4	4	5	5	4	4	5	2.25	1.6	4.8	4.36364	0	1
6283923	1	2	1	1	2	2	1	3	4	3	3	0	0	-1	1	0	0	1	4	5	5	4	3	4	4	3	3	4	4	4	3	3	2	3	4	4	3	4	3	3.25	4.2	3.6	3.36364	0	1
6283872	1	0	1	0	1	0	1	3	4	3	3	0	0	0	0	-1	1	1	4	5	5	5	5	4	5	5	4	4	5	3	4	3	3	4	4	5	4	4	5	3.25	4.8	4.4	4	0	1
6283875	0	0	1	0	1	1	1	4	5	5	4	1	0	0	1	0	0	1	4	4	5	4	4	4	5	4	4	5	4	4	5	4	4	4	5	4	4	4	4	4.5	4.2	4.4	4.18182	2	1
6283860	1	0	0	1	1	0	1	5	4	5	5	1	-1	0	0	0	0	1	5	4	5	4	5	4	4	4	5	5	5	4	4	4	5	4	4	5	3	4	4	4.75	4.6	4.4	4.18182	0	1
6283857	1	1	0	1	1	1	1	5	5	5	5	0	-1	-1	0	0	0	0	4	5	5	5	4	5	5	5	5	3	4	5	5	5	5	5	5	5	4	5	5	5	4.6	4.6	4.81818	-2	0
6283851	0	0	2	1	1	0	1	3	4	5	3	0	-1	0	0	0	0	1	5	4	5	5	4	5	5	4	5	4	5	4	5	4	5	5	4	5	4	5	5	3.75	4.6	4.6	4.63636	-1	0
6283850	1	1	1	0	1	2	1	4	4	4	5	0	-1	0	0	0	1	0	5	4	4	5	5	4	5	4	4	5	4	4	4	4	5	4	5	5	4	5	5	4.25	4.6	4.4	4.45455	0	1
6283816	1	1	1	1	2	2	1	4	4	4	4	1	-1	0	0	-1	0	1	4	4	5	4	4	4	4	4	4	3	4	4	4	5	4	4	4	4	4	4	4	4	4.2	3.8	4.09091	-1	0
6274916	1	0	1	1	2	0	1	4	5	4	4	0	0	0	1	0	0	0	5	4	5	4	4	5	4	4	4	4	5	4	4	4	4	5	4	5	4	4	5	4.25	4.4	4.2	4.36364	1	1
6270936	0	0	2	0	1	0	1	3	2	2	1	0	0	0	1	0	0	0	4	5	4	4	5	4	3	4	4	5	4	5	4	4	3	4	5	4	4	5	4	2	4.4	4	4.18182	1	1
6268803	1	2	2	0	0	2	1	2	3	2	3	0	0	0	0	0	1	1	4	5	4	4	4	4	4	5	4	5	5	4	4	5	5	4	4	5	4	4	5	2.5	4.2	4.4	4.45455	1	1
6265720	1	1	1	1	1	1	1	4	4	5	4	0	-1	0	1	0	0	0	4	3	4	2	4	4	5	5	5	4	4	5	4	4	4	4	5	4	4	4	4	4.25	3.4	4.6	4.18182	0	1
6265674	1	0	1	1	1	1	1	2	4	4	4	0	-1	0	0	0	0	0	4	4	5	4	4	4	5	4	4	4	4	4	5	4	4	5	4	5	5	4	4	3.5	4.2	4.2	4.36364	-1	0
6263968	0	0	1	0	1	0	1	3	4	5	4	0	-1	0	0	0	0	0	4	5	4	5	5	4	5	5	4	3	4	5	5	4	3	4	5	3	4	3	4	4	4.6	4.2	4	-1	0
6263910	1	1	1	0	1	1	1	5	4	4	3	0	-1	0	0	-1	0	0	4	4	5	4	5	4	5	4	4	4	4	3	4	5	4	4	5	4	5	4	4	4	4.4	4.2	4.18182	-2	0
6264590	1	0	1	1	2	0	1	5	4	4	3	0	-1	0	0	0	0	1	4	5	4	4	5	4	5	5	5	4	4	3	5	4	4	4	5	5	5	3	4	4	4.4	4.6	4.18182	-1	0
6263574	0	0	1	0	0	1	1	5	4	4	5	0	-1	0	0	0	0	1	5	4	5	4	5	4	5	4	5	4	5	4	4	4	5	5	4	4	4	4	5	4.5	4.6	4.4	4.36364	-1	0
6263600	1	0	0	1	1	1	1	4	4	5	4	0	0	0	0	-1	1	1	4	4	5	5	5	5	5	4	4	4	4	5	5	4	4	4	4	5	4	4	4	4.25	4.6	4.4	4.27273	0	1
6382006	1	1	0	1	0	2	1	4	5	5	5	1	0	0	1	0	0	0	4	5	5	5	5	4	5	4	5	4	4	4	5	5	5	5	5	5	5	4	5	4.75	4.8	4.4	4.72727	2	1
6381939	1	1	2	0	1	0	1	5	4	4	4	1	0	0	0	0	0	1	4	4	4	5	5	5	5	4	4	4	4	4	4	5	4	4	5	4	3	2	2	4.25	4.4	4.4	3.72727	1	1
6381688	1	0	1	0	1	0	1	4	5	4	5	1	-1	0	1	-1	1	0	1	3	2	4	2	5	4	5	1	3	3	2	4	3	3	4	1	3	1	5	3	4.5	2.4	3.6	2.90909	1	1
6383172	1	0	0	1	1	0	1	5	1	3	5	1	0	0	1	-1	0	1	3	4	4	3	5	3	2	4	1	4	4	4	3	3	3	2	4	4	1	3	5	3.5	3.8	2.8	3.27273	1	1
6383225	1	1	1	1	1	0	1	5	4	5	4	0	-1	0	1	0	0	0	5	4	5	4	5	4	5	4	5	4	5	4	5	4	5	4	5	4	5	4	5	4.5	4.6	4.4	4.54545	0	1
6381923	1	0	1	1	1	0	1	3	4	2	3	0	0	0	1	0	0	1	2	3	5	3	5	4	4	3	4	5	4	5	4	3	2	4	4	3	4	5	3	3	3.6	4	3.72727	1	1
6381764	1	2	1	1	1	0	1	3	4	5	3	0	-1	0	0	0	0	0	3	4	4	4	3	4	5	4	4	3	4	3	4	3	4	3	3	2	2	2	3	3.75	3.6	4	3	-1	0
6381460	1	0	1	1	1	0	1	4	4	5	5	0	-1	-1	0	0	0	1	4	5	5	4	4	5	4	5	5	4	4	5	5	4	4	5	5	4	5	4	4	4.5	4.4	4.6	4.45455	-2	0
6382367	1	0	0	0	0	0	1	3	1	2	3	0	0	0	0	0	1	0	3	4	4	4	4	4	4	4	3	5	3	3	1	3	4	3	5	5	5	3	3	2.25	3.8	4	3.45455	1	1
6381952	1	0	0	0	1	0	1	4	5	5	5	0	-1	-1	0	0	0	0	3	4	5	3	4	5	5	5	3	5	4	3	5	1	1	3	1	3	5	5	1	4.75	3.8	4.6	2.90909	-2	0
6383715	1	1	1	1	1	1	1	4	4	3	4	0	-1	0	0	0	0	0	4	5	5	4	5	4	4	4	3	4	4	3	3	4	5	4	4	3	4	4	3	3.75	4.6	3.8	3.72727	-1	0
6382557	1	0	2	1	1	1	1	4	4	2	4	1	-1	0	0	0	0	1	4	3	3	5	3	4	4	3	3	2	4	3	4	5	5	5	4	4	3	4	5	3.5	3.6	3.2	4.18182	0	1
6383614	1	1	2	1	1	1	1	3	4	4	3	0	-1	0	0	0	0	1	4	5	5	4	3	4	4	5	4	5	4	3	4	2	3	4	3	4	3	4	4	3.5	4.2	4.4	3.45455	-1	0
6382843	1	0	2	1	0	0	1	4	4	4	4	0	0	0	0	-1	1	0	4	4	5	5	4	3	4	4	5	3	4	4	5	5	5	4	3	4	5	4	4	4	4.4	3.8	4.27273	0	1
6383161	1	0	1	1	1	0	1	5	4	3	3	1	-1	0	0	0	0	0	5	3	4	3	4	4	3	4	5	2	4	4	3	4	3	4	3	4	5	3	4	3.75	3.8	3.6	3.72727	0	1
6383017	1	0	0	1	1	0	1	3	3	4	4	0	-1	-1	0	0	0	0	3	4	4	4	3	4	5	4	3	4	4	4	4	5	3	3	4	5	3	5	2	3.5	3.6	4	3.81818	-2	0
6382689	1	0	1	1	1	0	1	2	4	3	2	0	-1	0	0	-1	1	1	5	5	4	4	5	3	5	4	4	4	4	4	5	5	5	4	3	2	3	2	4	2.75	4.6	4	3.72727	-1	0
6382690	0	0	0	1	1	0	1	3	3	4	4	0	-1	0	0	0	0	1	4	4	5	4	4	4	4	4	4	3	4	4	3	3	4	4	4	3	4	4	3	3.5	4.2	3.8	3.63636	-1	0
6381553	1	2	2	0	1	2	1	4	4	4	4	0	-1	0	0	0	1	1	3	4	4	4	3	3	3	4	2	3	4	3	3	3	4	3	2	3	2	2	2	4	3.6	3	2.81818	0	1
6381262	1	0	1	1	1	0	1	4	4	4	3	1	0	0	0	0	1	0	4	3	4	4	4	3	3	4	4	4	4	3	3	4	4	4	4	3	3	4	4	3.75	3.8	3.6	3.63636	2	1
6381202	0	1	0	0	1	1	1	4	4	4	4	1	0	-1	0	-1	0	1	3	4	4	4	3	4	4	3	4	4	3	4	4	4	4	4	3	4	4	3	4	4	3.6	3.8	3.72727	-1	0
6381145	1	0	1	0	1	0	1	2	4	4	3	0	-1	0	0	0	0	1	4	5	5	4	4	4	4	5	3	5	5	4	4	5	5	5	5	4	3	4	4	3.25	4.4	4.2	4.36364	-1	0
6381132	1	0	0	1	1	0	1	4	4	4	4	1	-1	0	0	0	0	0	3	3	4	4	4	3	4	4	4	3	5	5	4	4	4	3	4	2	4	3	4	4	3.6	3.6	3.81818	0	1
6381153	1	0	1	1	1	0	1	4	5	4	4	1	0	0	0	0	0	1	4	4	3	4	4	4	4	5	4	3	4	3	4	4	4	4	3	3	3	4	5	4.25	3.8	4	3.72727	1	1
6380980	1	1	1	1	2	2	1	4	4	4	3	0	-1	0	0	0	0	0	4	4	4	3	4	3	3	4	4	4	4	4	5	4	3	3	4	4	3	4	4	3.75	3.8	3.6	3.81818	-1	0
6380946	0	2	1	1	1	0	1	5	5	4	4	0	0	0	0	-1	1	0	4	5	4	4	5	3	3	2	4	4	4	3	4	4	5	4	3	3	4	5	5	4.5	4.4	3.2	4	0	1
6380850	1	0	1	1	1	1	1	5	4	5	4	0	-1	0	0	0	0	1	4	5	4	4	5	4	4	5	5	4	4	5	4	5	5	4	4	5	5	4	4	4.5	4.4	4.4	4.45455	-1	0
